# Supplementary material for: Maspin is a PTEN-Upregulated and p53-Upregulated Tumor Suppressor Gene and Acts as an HDAC1 Inhibitor in Human Bladder Cancer
Source: MDPI journal article supplement (doi:10.3390/cancers12010010), 2019-12-18
Supplement: s1 [file s1]

Fig 1E. RT4, HT, T24, 8301

Actin

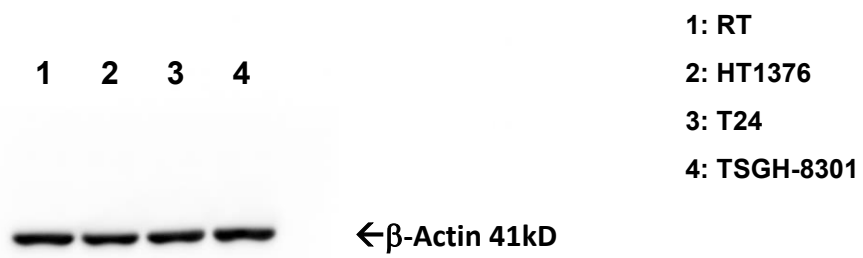

Maspin

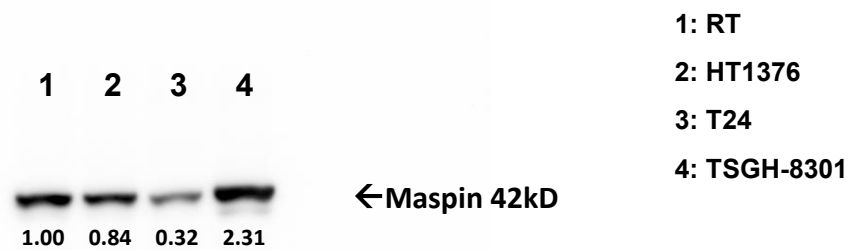

Fig 2A. RT4(shCOL, shMaspin)

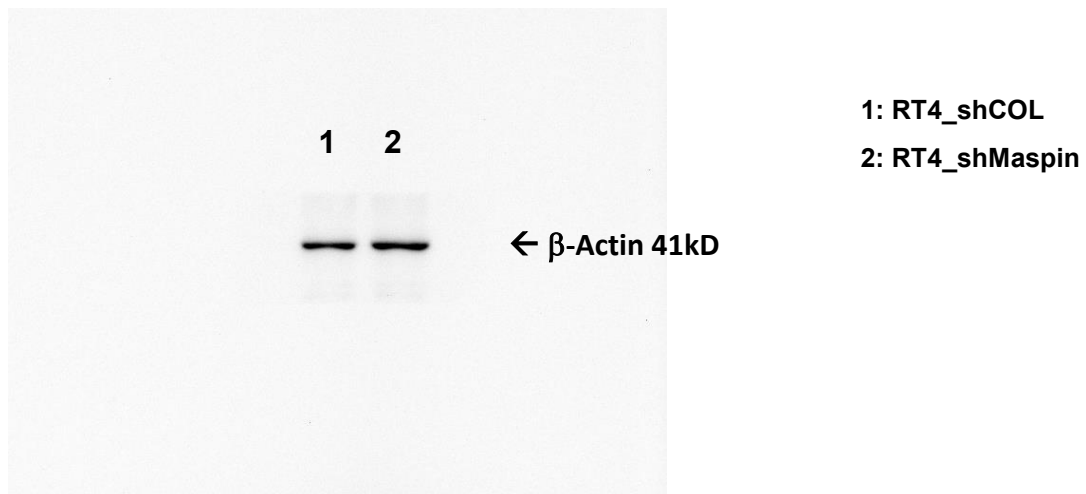

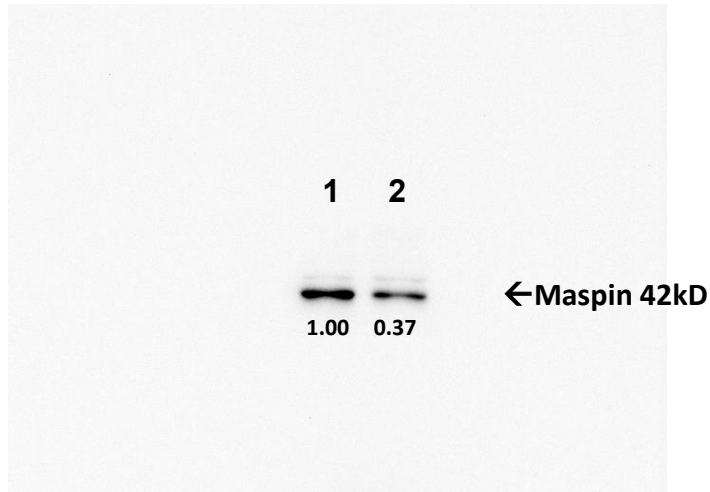

1: RT4-shCOL  
2: RT4-shMaspin

Fig 2B. T24(DNA, MASPIN)

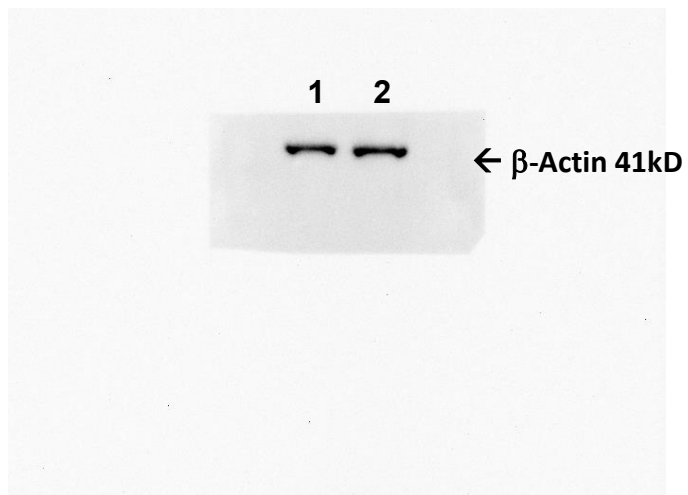

1: T24-DNA  
2: T24-Maspin

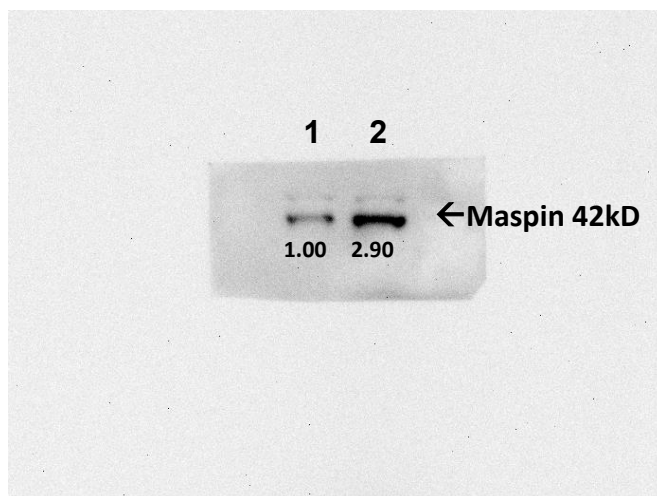

1: T24-DNA  
2: T24-Maspin

Fig 3A. HT(shcoL, shMaspin)

Actin

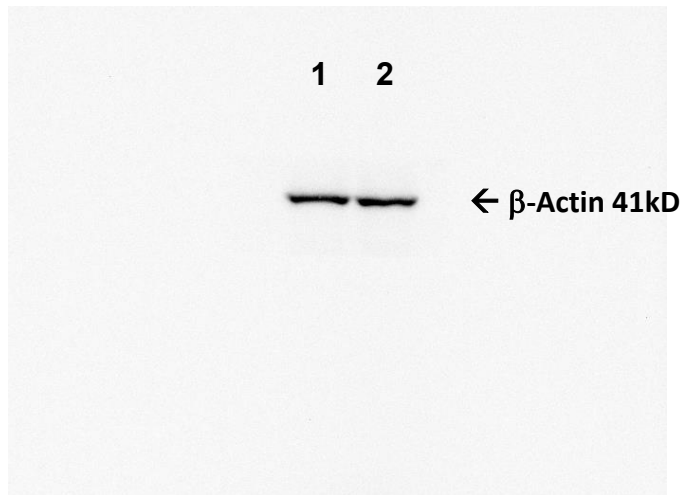

1: HT\_shCOL

2: HT\_shMaspin

Maspin

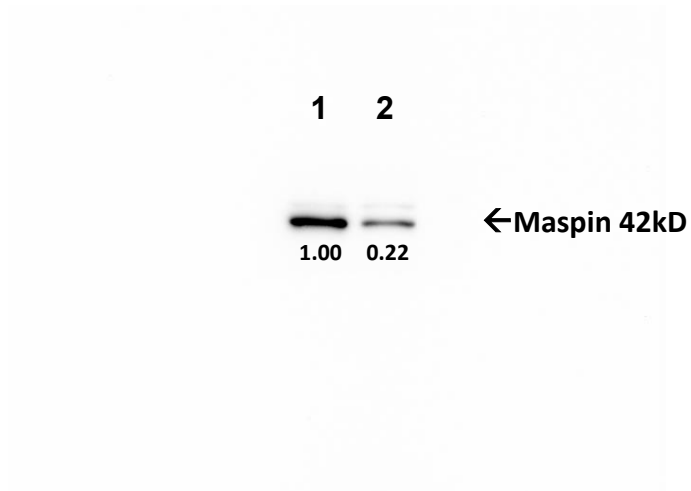

1: HT\_shCOL

2: HT\_shMaspin

Fig 3B. T24(DNA, MASPIN)

Actin

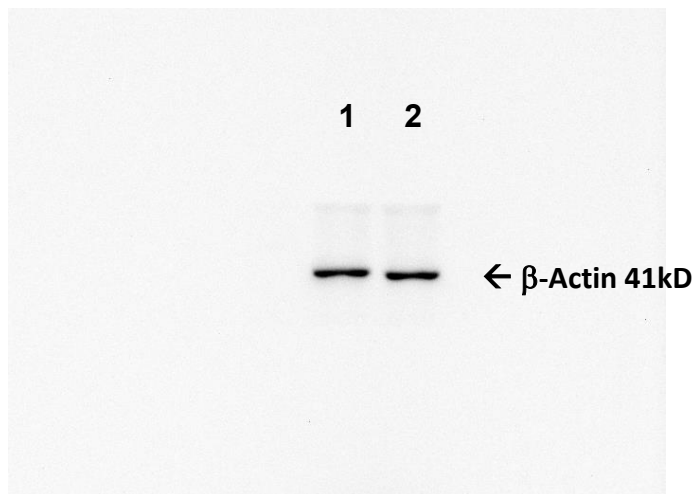

1: T24-DNA

2: T24-Maspin

Maspin

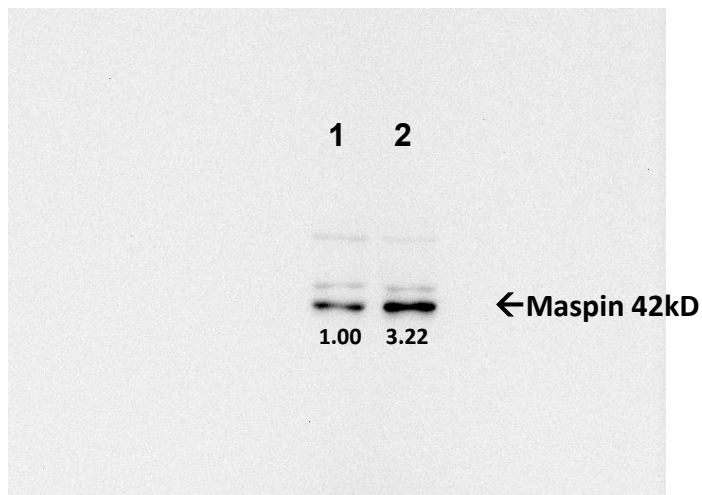

1: T24-DNA

2: T24-Maspin

Fig 4E. tumor xenografts HT(shCOL, shMaspin)  
Actin

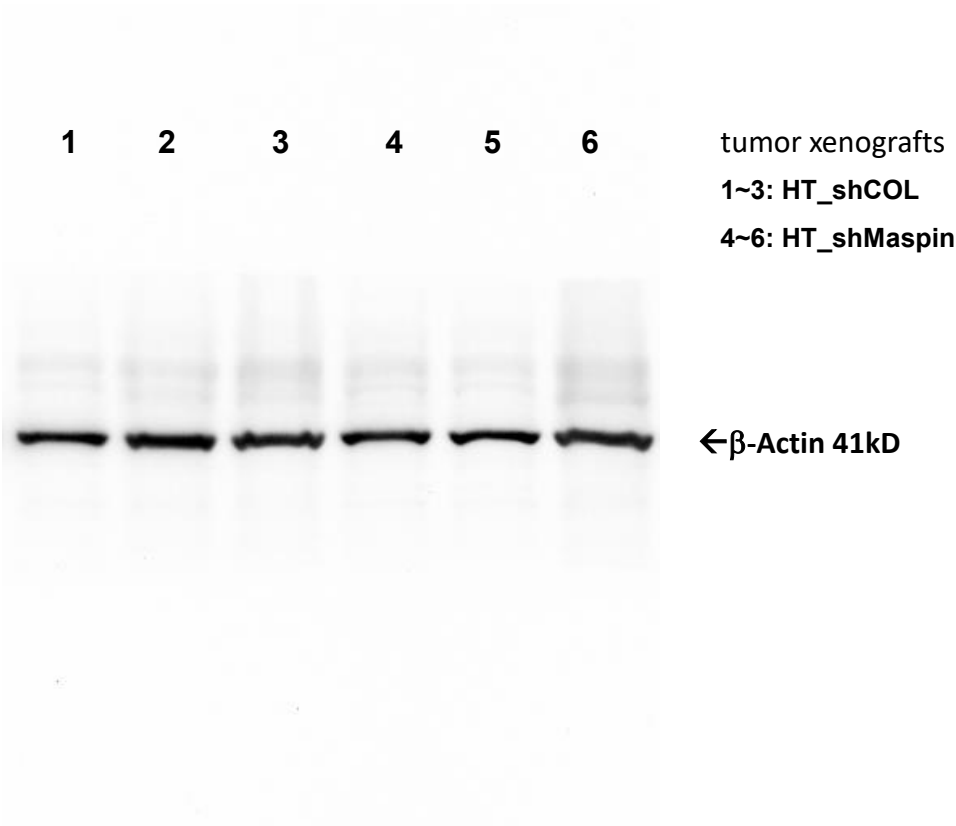

Maspin

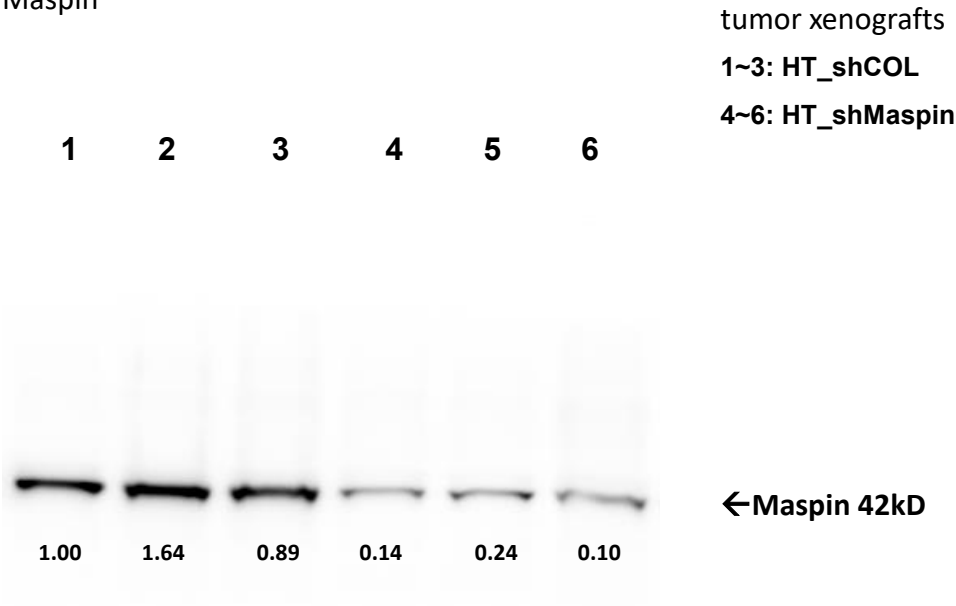

Fig 5A Left. RT4(shCOL, shMaspin)

Actin

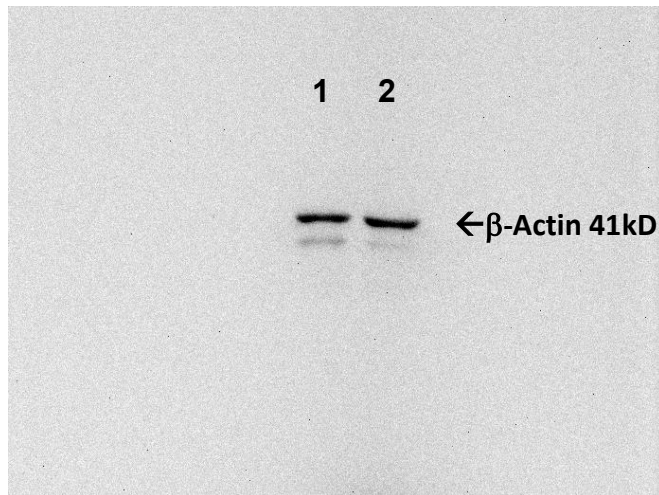

1: RT4\_shCOL

2: RT4\_shMaspin

Maspin

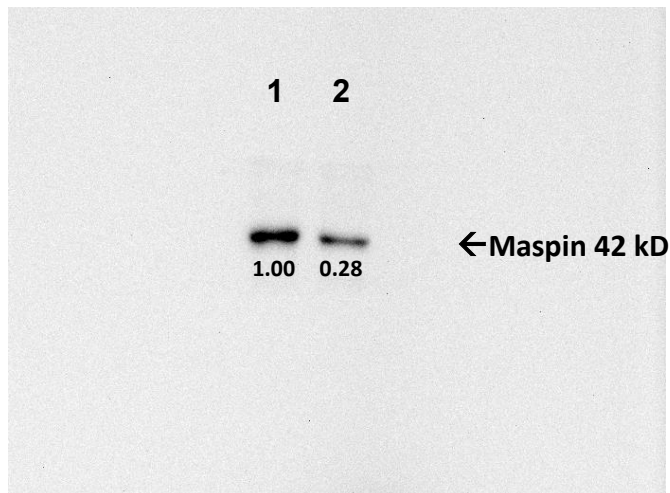

1: RT4\_shCOL

2: RT4\_shMaspin

Actin

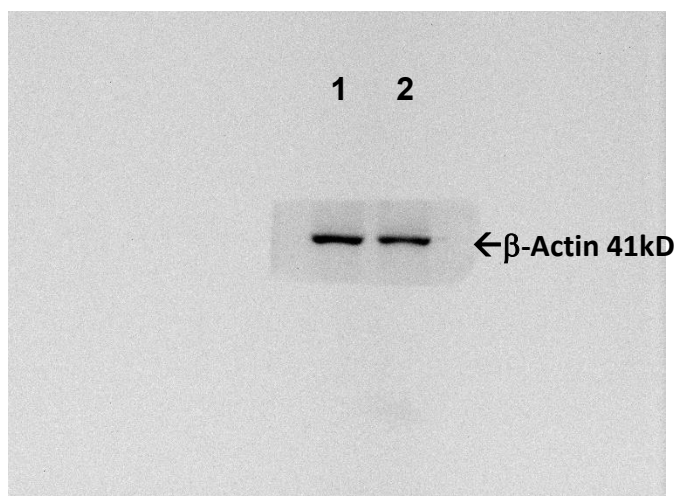

1: RT4\_shCOL

2: RT4\_shMaspin

Acetyl-H3

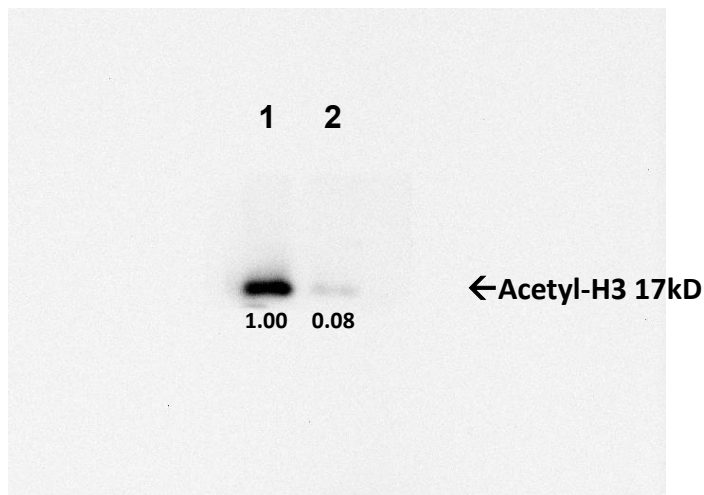

1: RT4\_shCOL  
2: RT4\_shMaspin

Actin

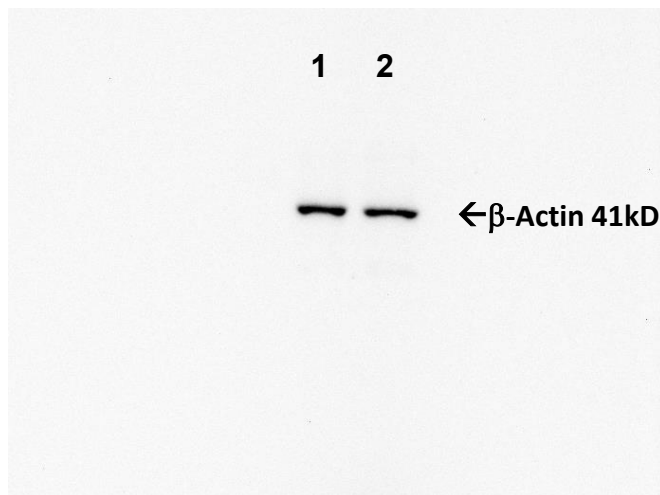

1: RT4\_shCOL  
2: RT4\_shMaspin

HDAC1

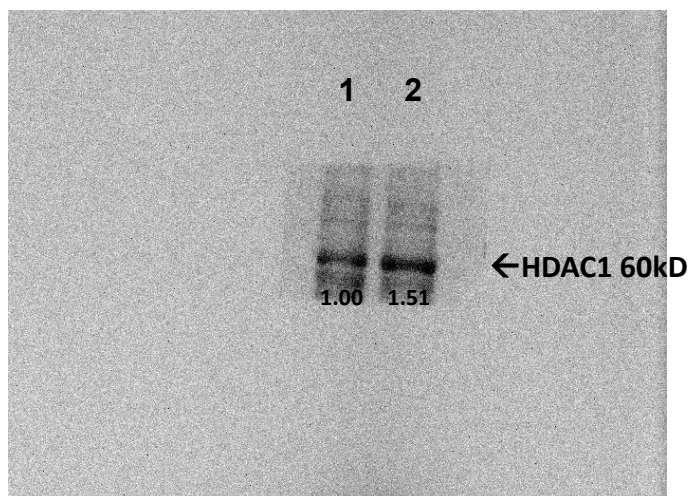

1: RT4\_shCOL  
2: RT4\_shMaspin

Fig 5A Mid. HT(shCOL, shMaspin)

Actin

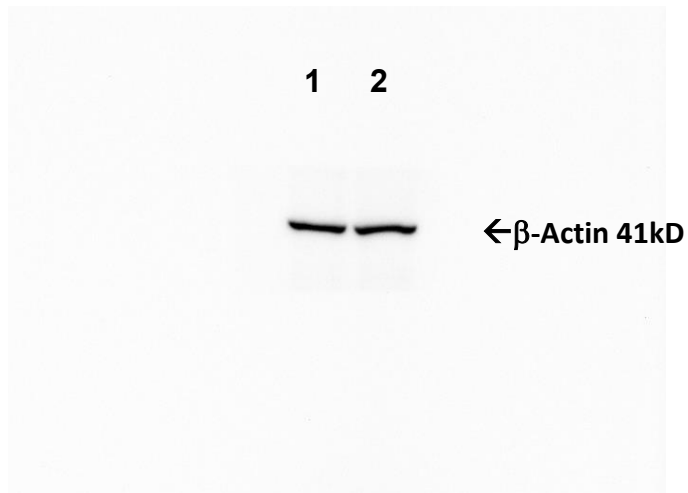

1: HT\_shCOL

2: HT\_shMaspin

Maspin

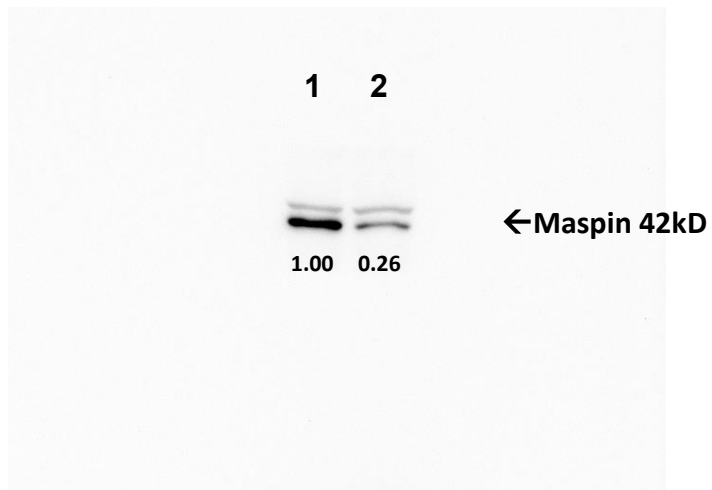

1: HT\_shCOL

2: HT\_shMaspin

Actin

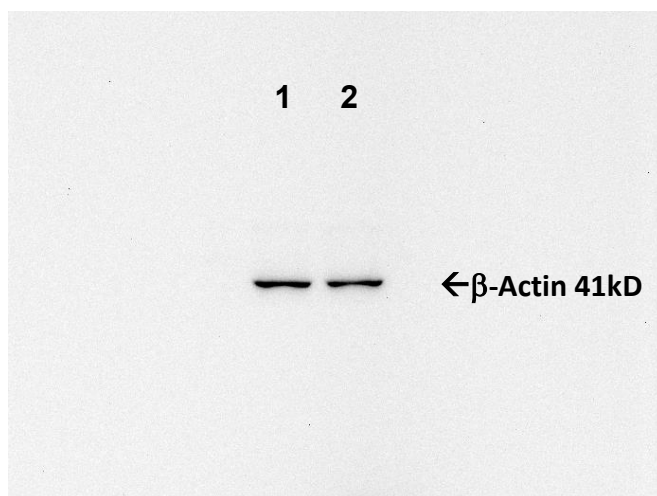

1: HT\_shCOL

2: HT\_shMaspin



Acetyl-H3

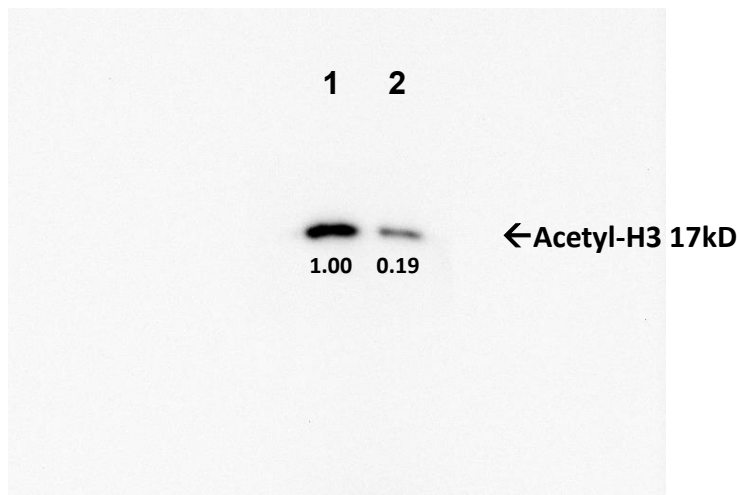

1: HT\_shCOL

2: HT\_shMaspin

Actin

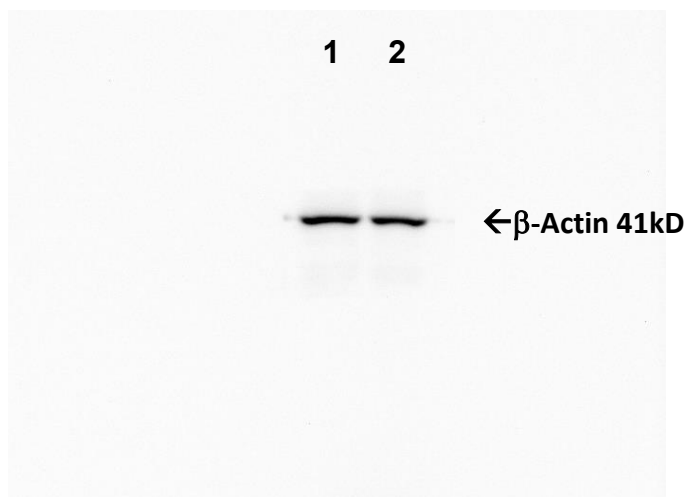

1: HT\_shCOL

2: HT\_shMaspin

HDAC1

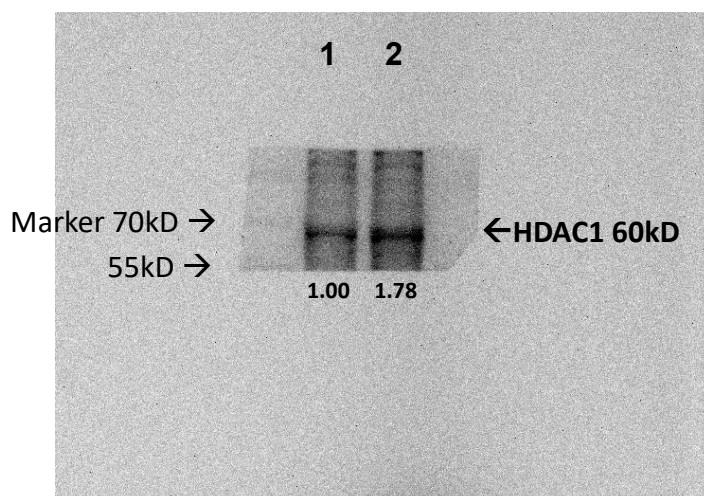

1: HT\_shCOL

2: HT\_shMaspin

Fig 5A Right. T24(DNA, Maspin)

Actin

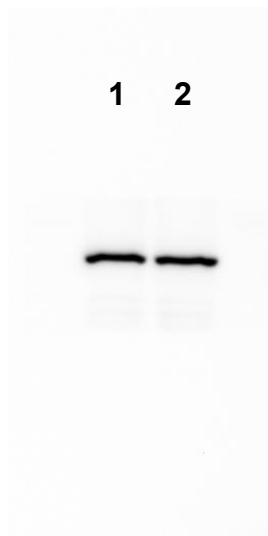

1: T24-DNA  
2: T24-Maspin

← $\beta$ -Actin 41kD

Maspin

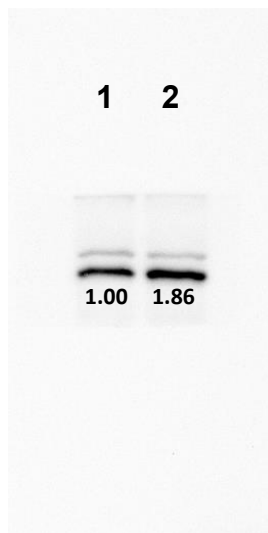

1: T24-DNA  
2: T24-Maspin

←MASPIN 42kD

Actin

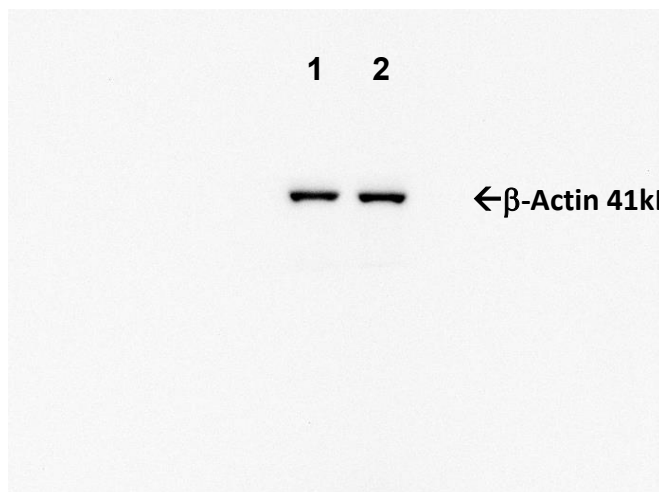

1: T24-DNA  
2: T24-MASPIN

← $\beta$ -Actin 41kD

Acetyl-H3

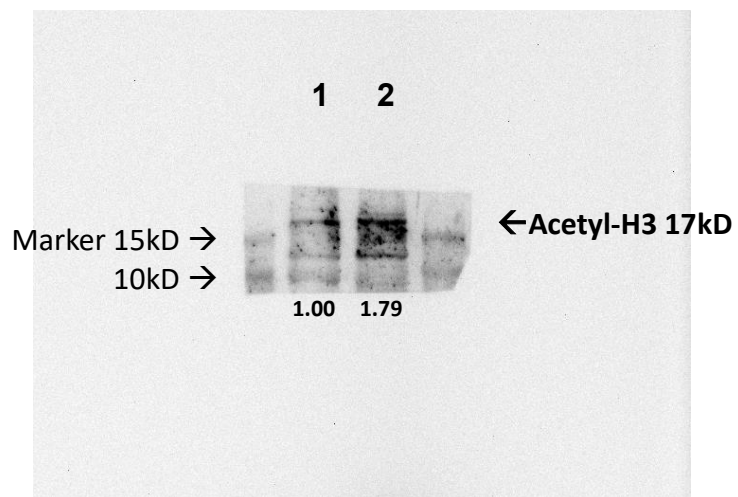

1: T24-DNA  
2: T24-Maspin

Actin

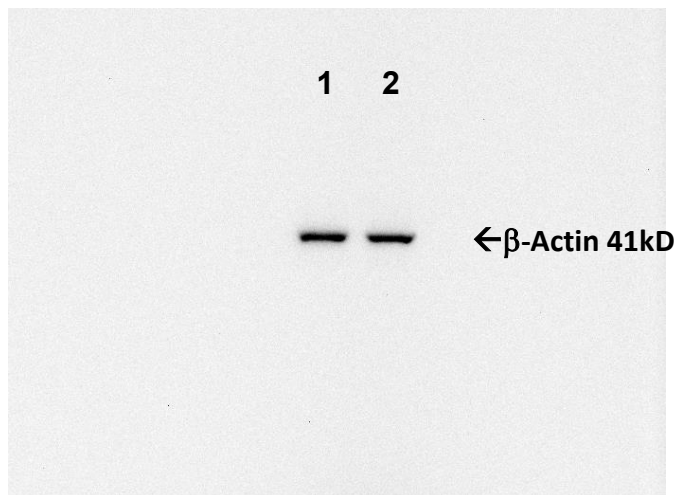

1: T24-DNA  
2: T24-Maspin

HDAC1

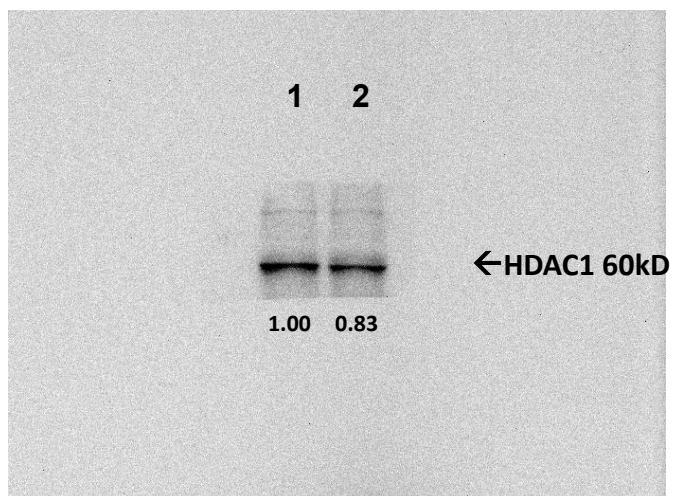

1: T24-DNA  
2: T24-Maspin

Fig 5D Left. RT4(shCOL, shMaspin)

Actin

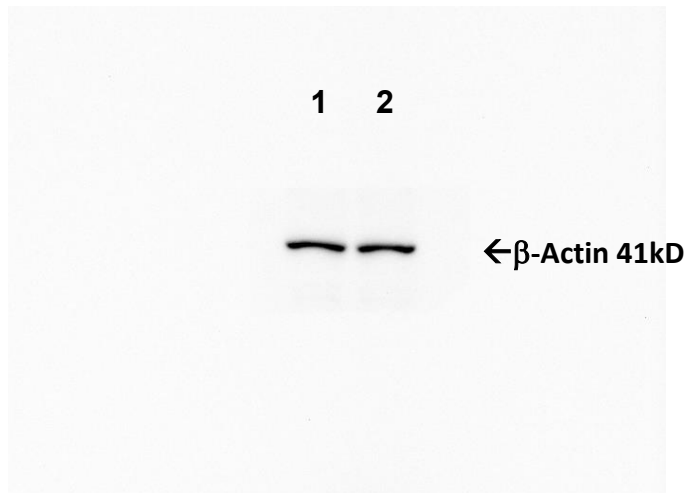

1: RT4\_shCOL

2: RT4\_shMaspin

Maspin

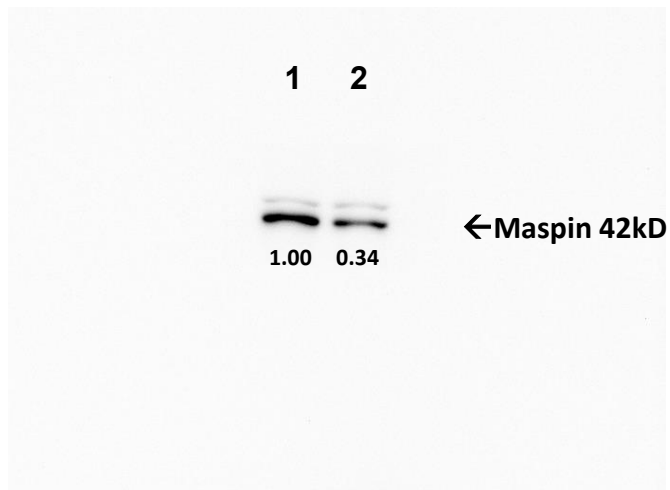

1: RT4\_shCOL

2: RT4\_shMaspin

CyclinD1

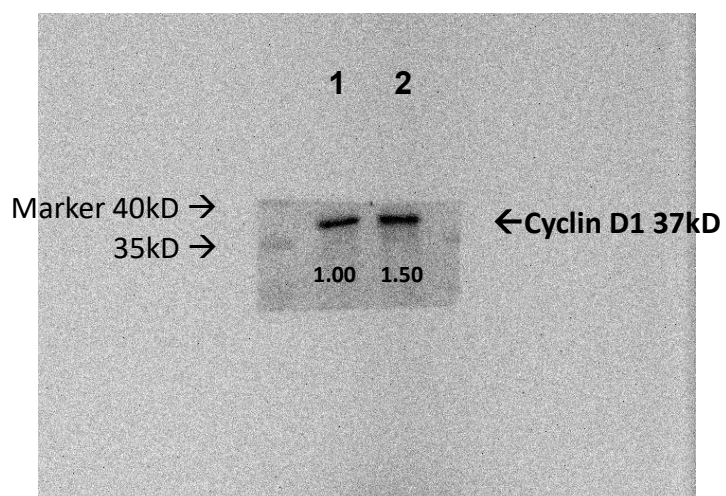

1: RT4\_shCOL

2: RT4\_shMaspin

P21

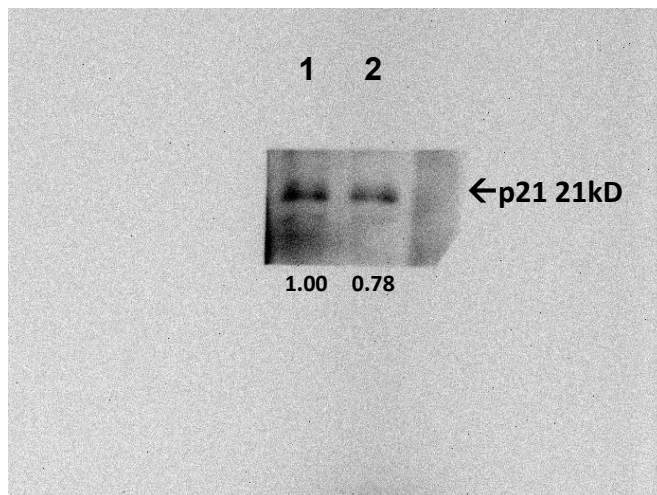

1: RT4\_shCOL  
2: RT4\_shMaspin

Vimentin

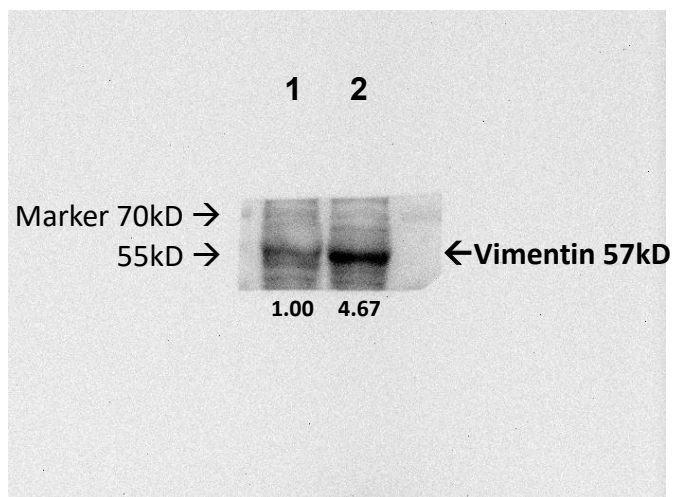

1: RT4\_shCOL  
2: RT4\_shMaspin

MMP9

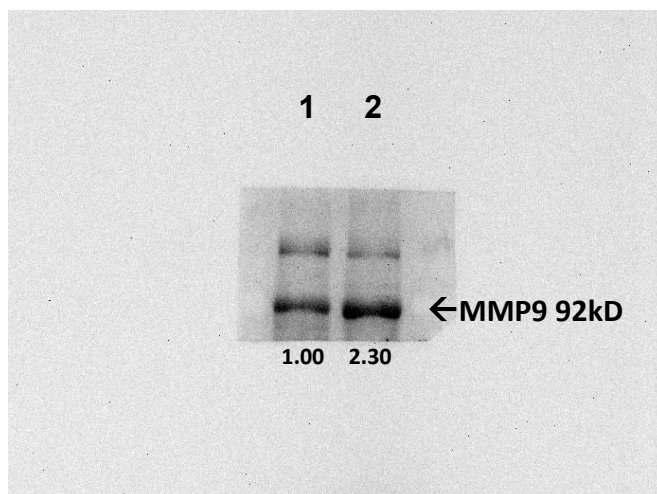

1: RT4\_shCOL  
2: RT4\_shMaspin

Fig 5D Mid. HT(shCOL, shMaspin)

Actin

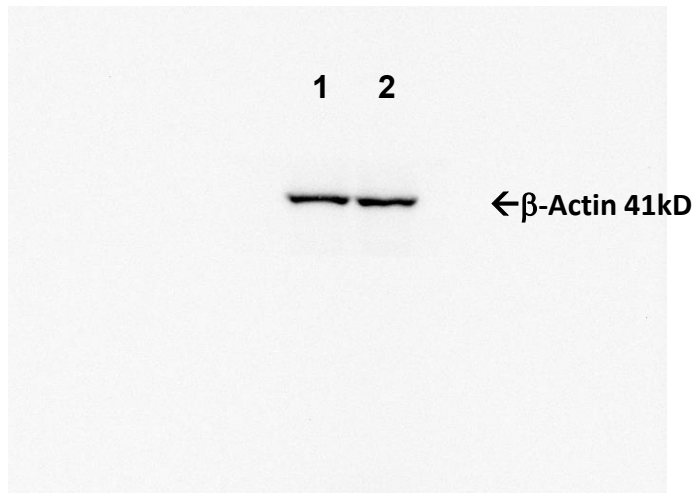

1: HT\_shCOL

2: HT\_shMaspin

Maspin

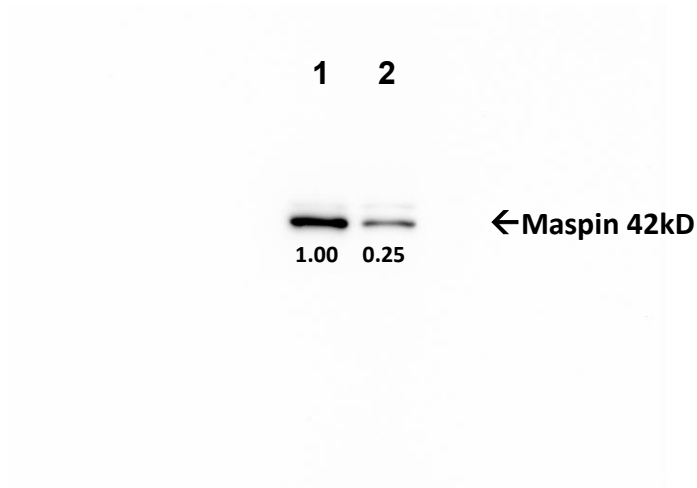

1: HT\_shCOL

2: HT\_shMaspin

CyclinD1

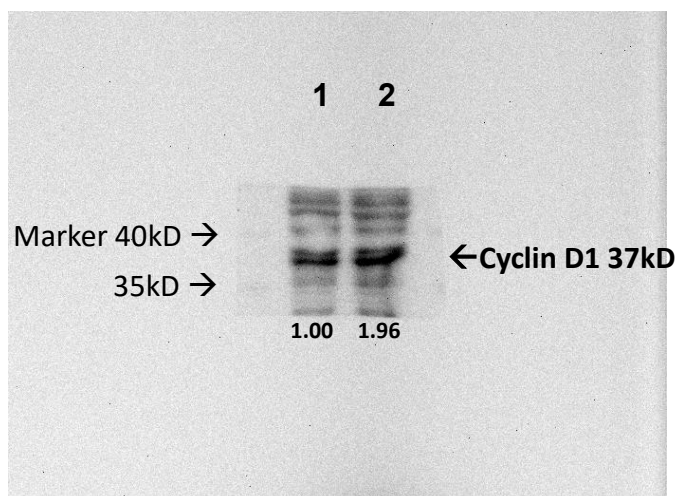

1: HT\_shCOL

2: HT\_shMaspin

P21

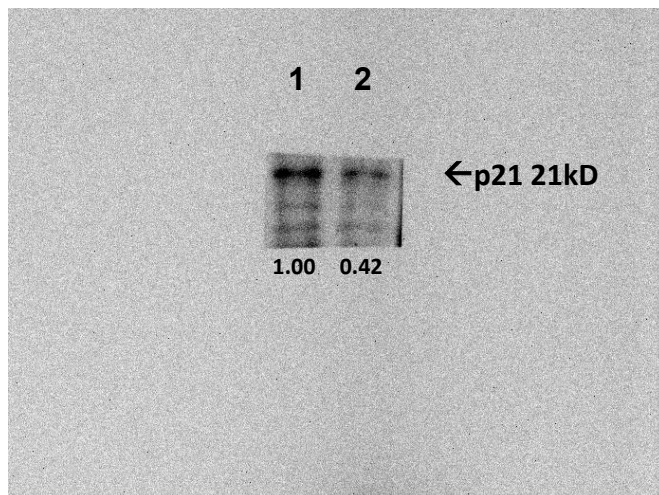

1: HT\_shCOL  
2: HT\_shMaspin

Vimentin

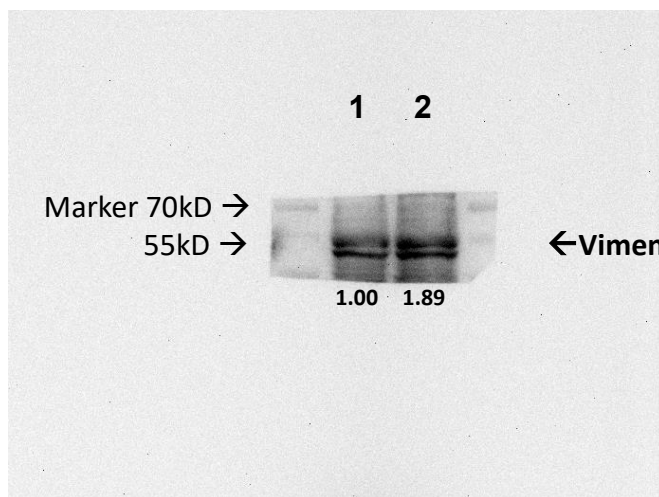

1: HT\_shCOL  
2: HT\_shMaspin

MMP9

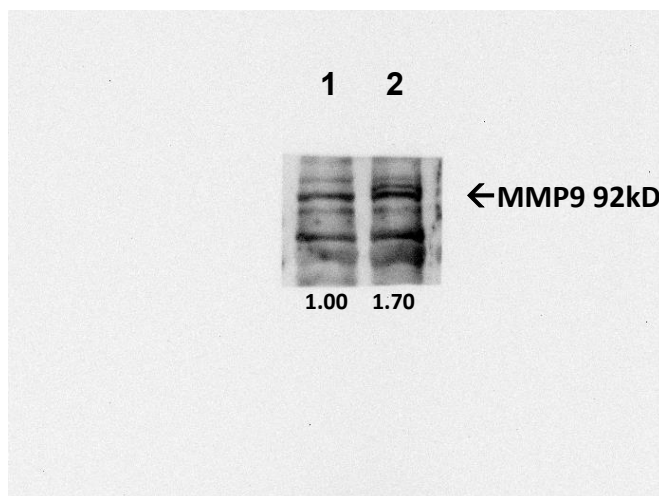

1: HT\_shCOL  
2: HT\_shMaspin

Fig 5D Right. T24(DNA, Maspin)

Actin

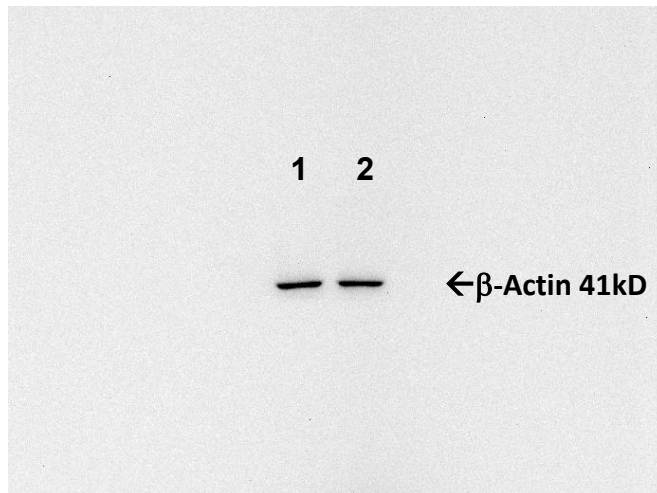

1: T24-DNA

2: T24-Maspin

Maspin

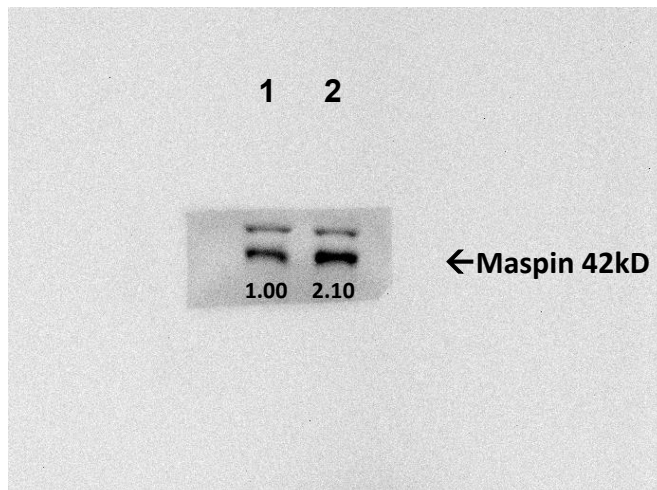

1: T24-DNA

2: T24-Maspin

CyclinD1

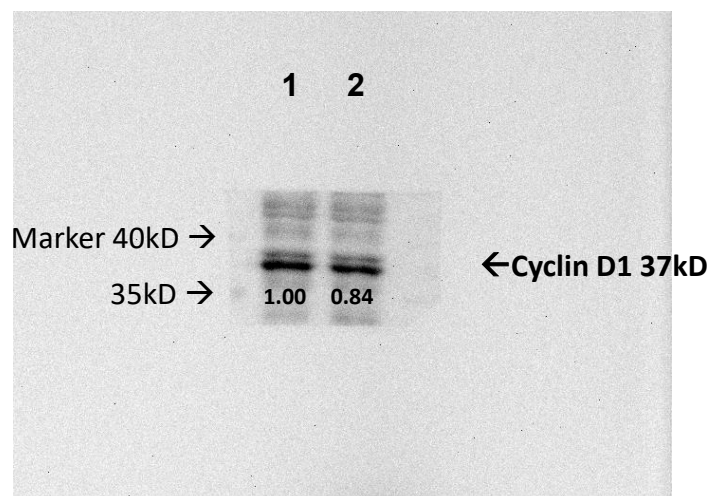

1: T24-DNA

2: T24-Maspin



P21

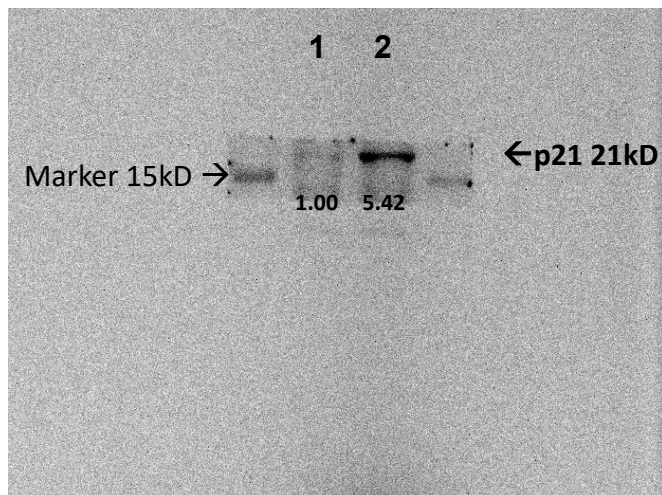

1: T24-DNA  
2: T24-Maspin

Vimentin

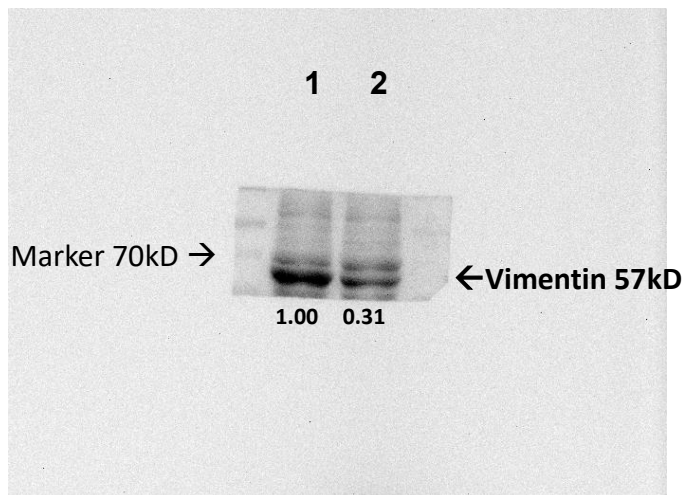

1: T24-DNA  
2: T24-Maspin

MMP9

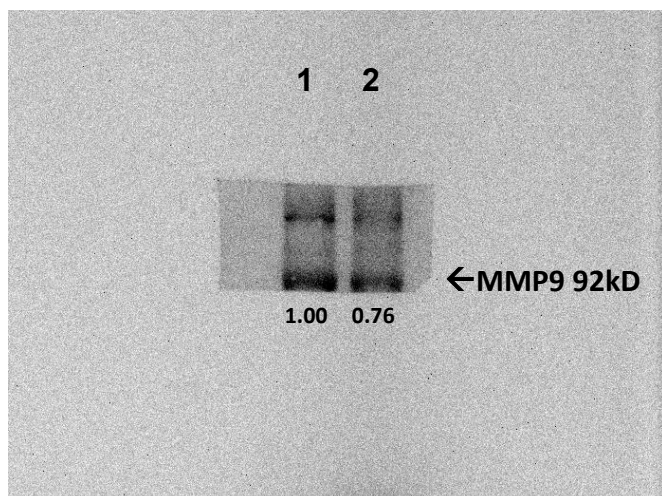

1: T24-DNA  
2: T24-Maspin

Fig 6A Left. RT4(shCOL, shPTEN)

Actin

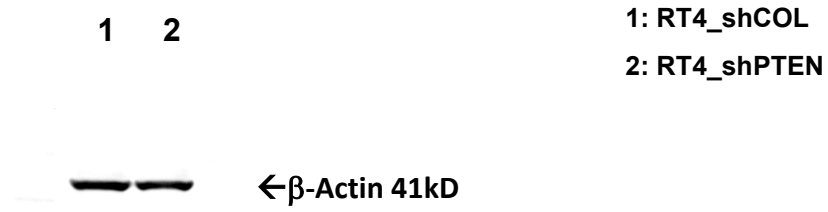

Maspin

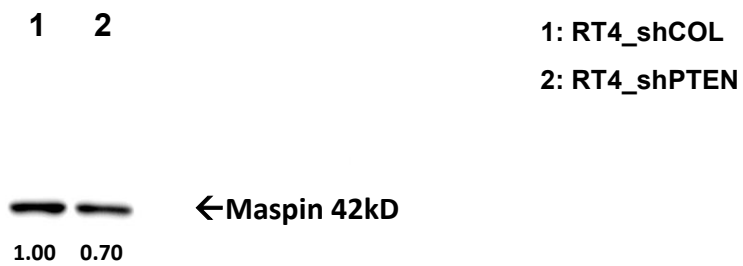

PTEN

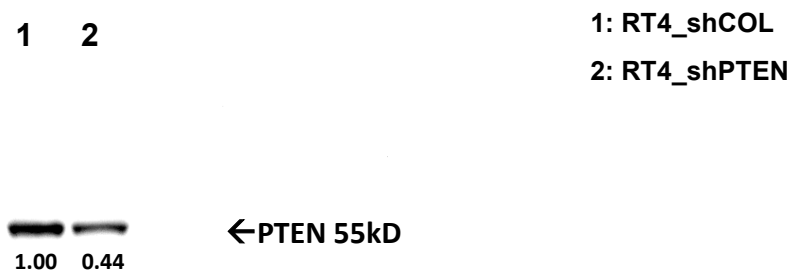

Fig 6A Right. T24(DNA, PTEN)

Actin

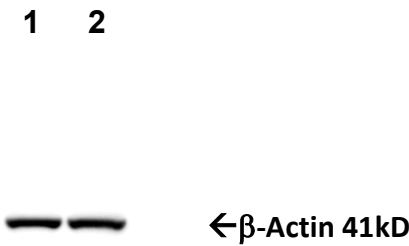

1: T24-DNA

2: T24-PTEN

Maspin

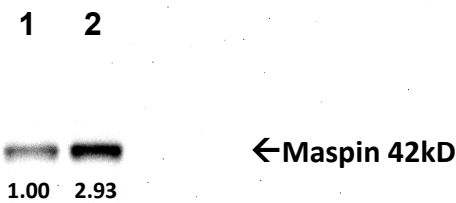

1: T24-DNA

2: T24-PTEN

PTEN

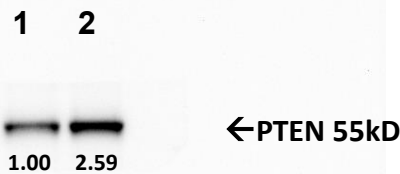

1: T24-DNA

2: T24-PTEN

Fig 6E. RT4(control, shCOL, shPTEN)

Actin

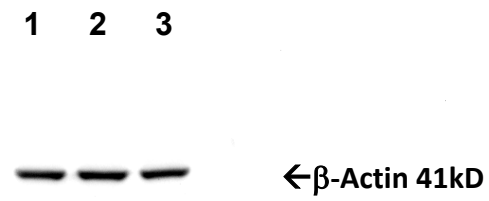

1: RT  
2: RT4\_shCOL  
3: RT4\_shPTEN

PTEN

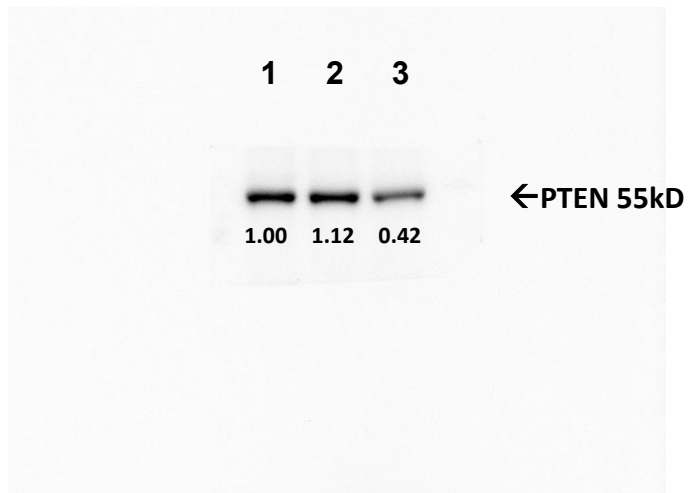

1: RT  
2: RT4\_shCOL  
3: RT4\_shPTEN

Maspin

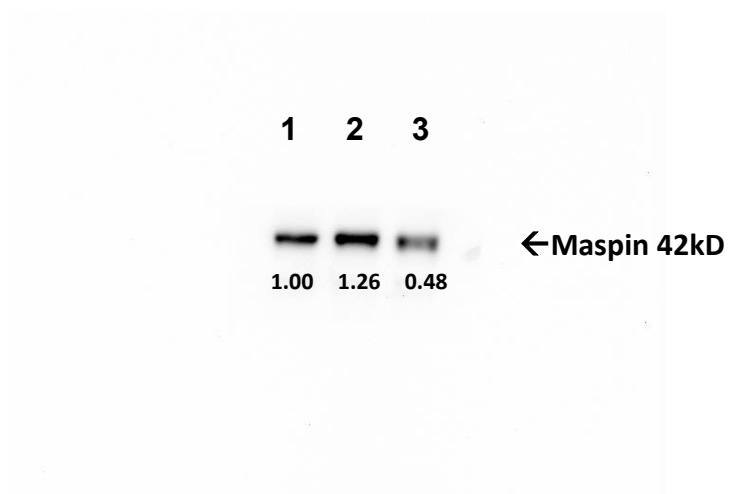

1: RT  
2: RT4\_shCOL  
3: RT4\_shPTEN

Akt

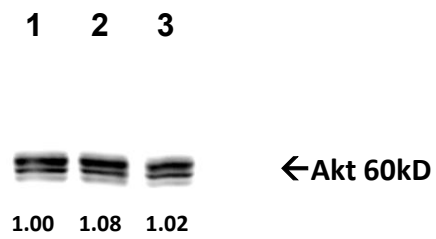

1: RT  
2: RT4\_shCOL  
3: RT4\_shPTEN

pAktS473

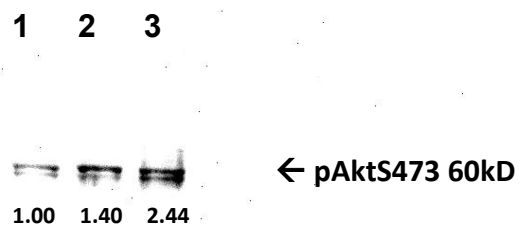

1: RT  
2: RT4\_shCOL  
3: RT4\_shPTEN

pAktT308

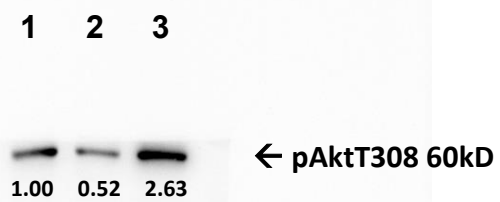

1: RT  
2: RT4\_shCOL  
3: RT4\_shPTEN

Fig 6F. RT4+VO-OHpic(0,250,500,1000)

Actin

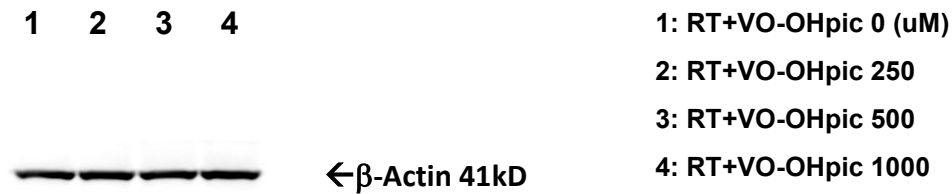

PTEN

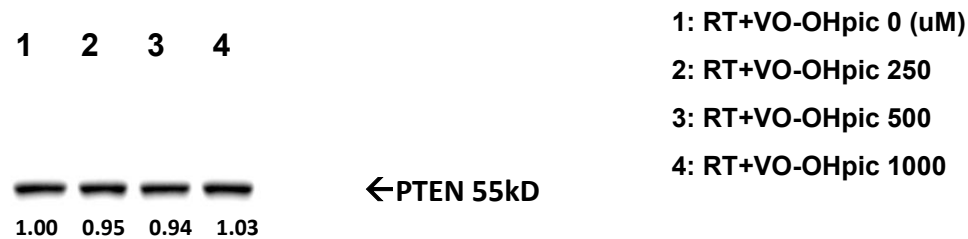

Maspin

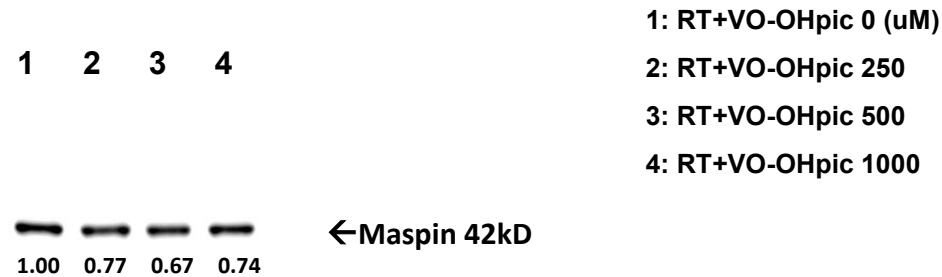

Akt

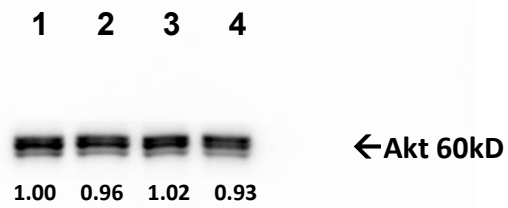

- 1: RT+VO-OHpic 0 (uM)
- 2: RT+VO-OHpic 250
- 3: RT+VO-OHpic 500
- 4: RT+VO-OHpic 1000

pAktS473

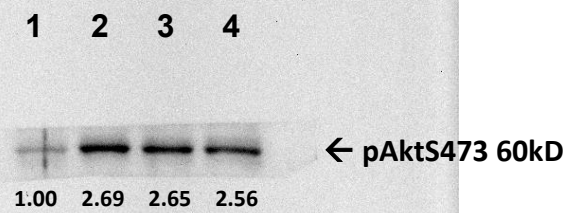

- 1: RT+VO-OHpic 0 (uM)
- 2: RT+VO-OHpic 250
- 3: RT+VO-OHpic 500
- 4: RT+VO-OHpic 1000

pAktT308

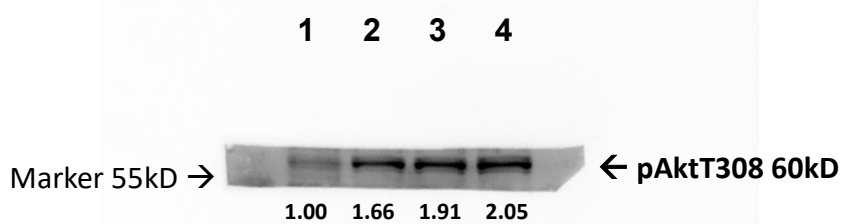

- 1: RT+VO-OHpic 0 (uM)
- 2: RT+VO-OHpic 250
- 3: RT+VO-OHpic 500
- 4: RT+VO-OHpic 1000

Fig 6l. Top. T24+MK2206(0,500,1000)  
Actin

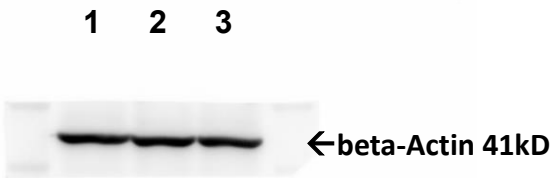

1: T24+MK2206 0 (uM)  
2: T24+MK2206 500  
3: T24+MK2206 1000

Akt

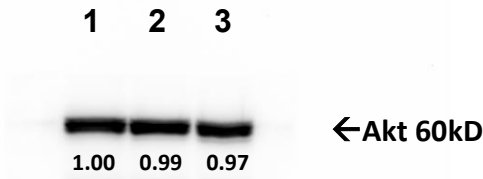

1: T24+MK2206 0 (uM)  
2: T24+MK2206 500  
3: T24+MK2206 1000

pAktS473

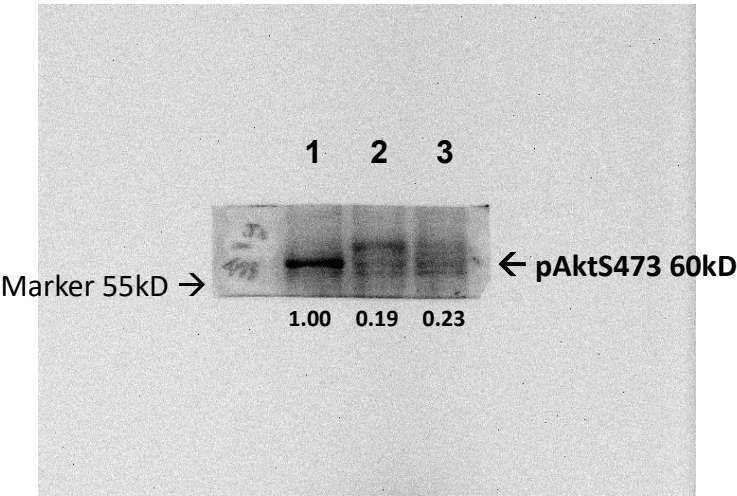

1: T24+MK2206 0 (uM)  
2: T24+MK2206 500  
3: T24+MK2206 1000



pAktT308

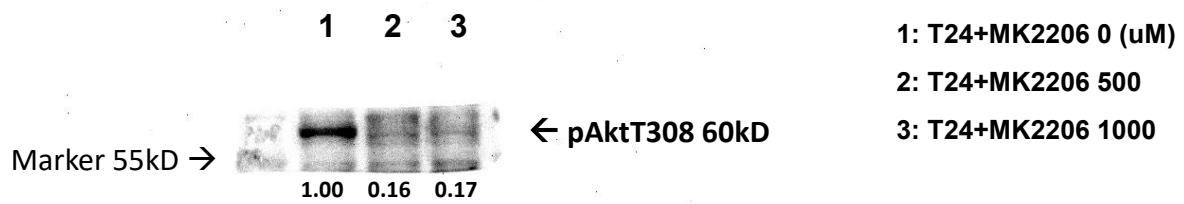

Fig 6l. bot. T24+MK2206(0,250,500,1000)

Actin

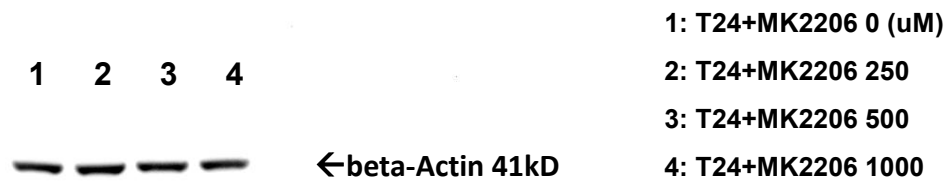

Maspin

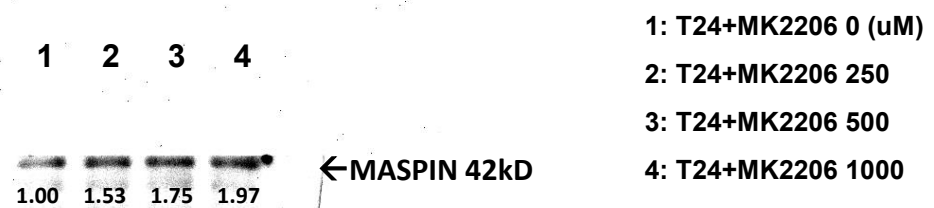

Fig 7A. HT(DNA, p53)

Actin

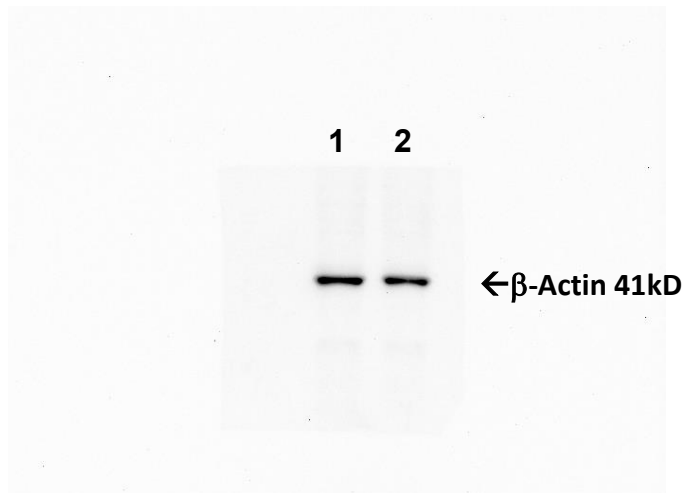

1: HT-DNA

2: HT-p53

p53

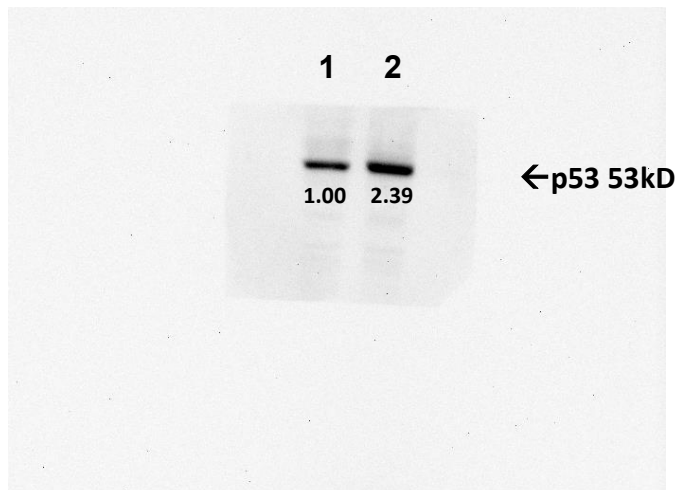

1: HT-DNA

2: HT-p53

Maspin

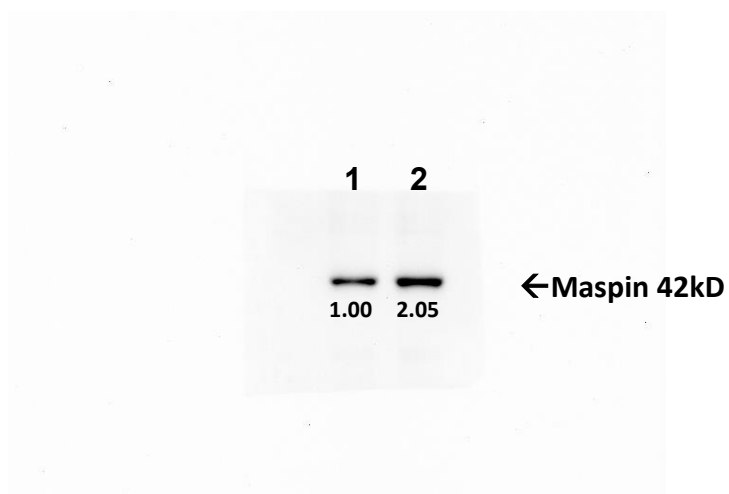

1: HT-DNA

2: HT-p53

Fig 7C. RT4\_shCOL, RT4-shp53 ±Cpt  
Actin

- 1: RT4\_shCOL +Vehicle
- 2: RT4\_hCOL +Cpt
- 3: RT4\_shp53 +Vehicle
- 4: RT4\_shp53 +Cpt

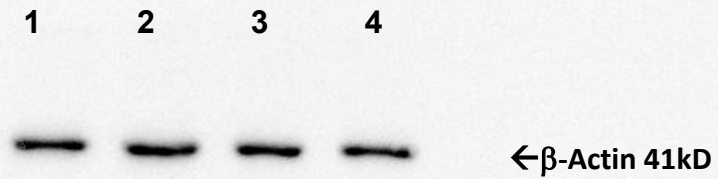

p53

- 1: RT4\_shCOL +Vehicle
- 2: RT4\_shCOL +Cpt
- 3: RT4\_shp53 +Vehicle
- 4: RT4\_shp53 +Cpt

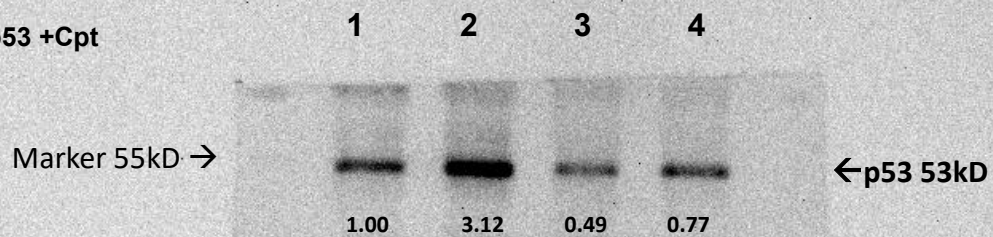

actin

- 1: RT4\_shCOL +Vehicle
- 2: RT4\_shCOL +Cpt
- 3: RT4\_shp53 +Vehicle
- 4: RT4\_shp53 +Cpt

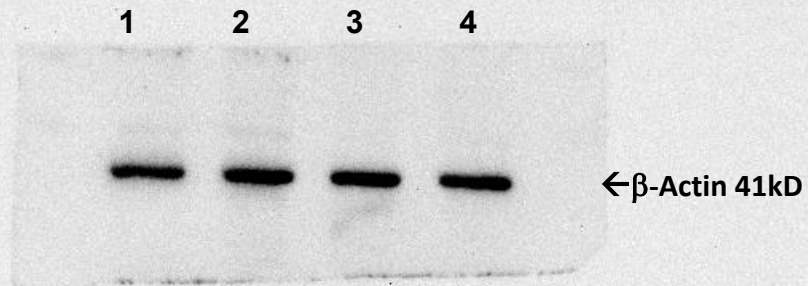

Maspin

- 1: RT4\_shCOL +Vehicle
- 2: RT4\_shCOL +Cpt
- 3: RT4\_shp53 +Vehicle
- 4: RT4\_shp53 +Cpt

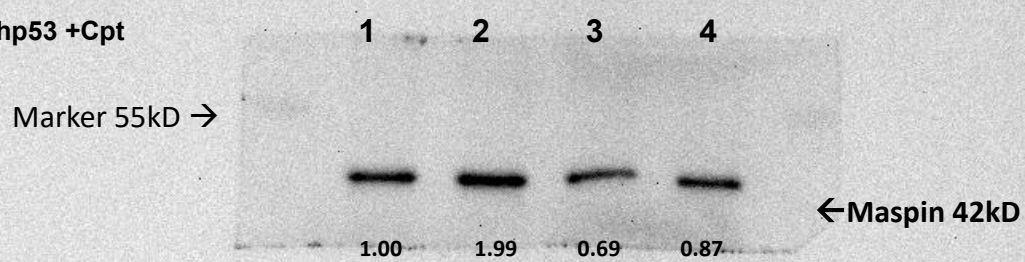

Figure supplementary 3. The original pictures of the immunoblot assays
