# Supplementary material for: Maspin is a PTEN-Upregulated and p53-Upregulated Tumor Suppressor Gene and Acts as an HDAC1 Inhibitor in Human Bladder Cancer
Source: MDPI journal article supplement (doi:10.3390/cancers12010010), 2019-12-18
Supplement: s1 [file s1]

**Table supplementary 1. Total HDAC1 activity (pmol/min/mg protein)**

|            | <b>RT4_shCOL</b> |              | <b>RT4-shMaspin</b> |              |
|------------|------------------|--------------|---------------------|--------------|
|            | <b>IgG</b>       | <b>HDAC1</b> | <b>IgG</b>          | <b>HDAC1</b> |
| <b>n=3</b> |                  |              |                     |              |
| <b>1</b>   | 171.76           | 396.18       | 98.11               | 393.94       |
| <b>2</b>   | 174.82           | 404.48       | 99.08               | 401.13       |
| <b>3</b>   | 177.32           | 413.92       | 100.39              | 409.97       |
|            |                  |              |                     |              |
|            | <b>T24-DNA</b>   |              | <b>T24-Maspin</b>   |              |
|            | <b>IgG</b>       | <b>HDAC1</b> | <b>IgG</b>          | <b>HDAC1</b> |
| <b>n=3</b> |                  |              |                     |              |
| <b>1</b>   | 193.48           | 510.99       | 160.09              | 371.80       |
| <b>2</b>   | 195.45           | 518.51       | 161.33              | 379.52       |
| <b>3</b>   | 199.15           | 530.81       | 164.52              | 388.01       |
