# Supplementary material for: Maspin is a PTEN-Upregulated and p53-Upregulated Tumor Suppressor Gene and Acts as an HDAC1 Inhibitor in Human Bladder Cancer
Source: MDPI journal article supplement (doi:10.3390/cancers12010010), 2019-12-18
Supplement: s1 [file s1]

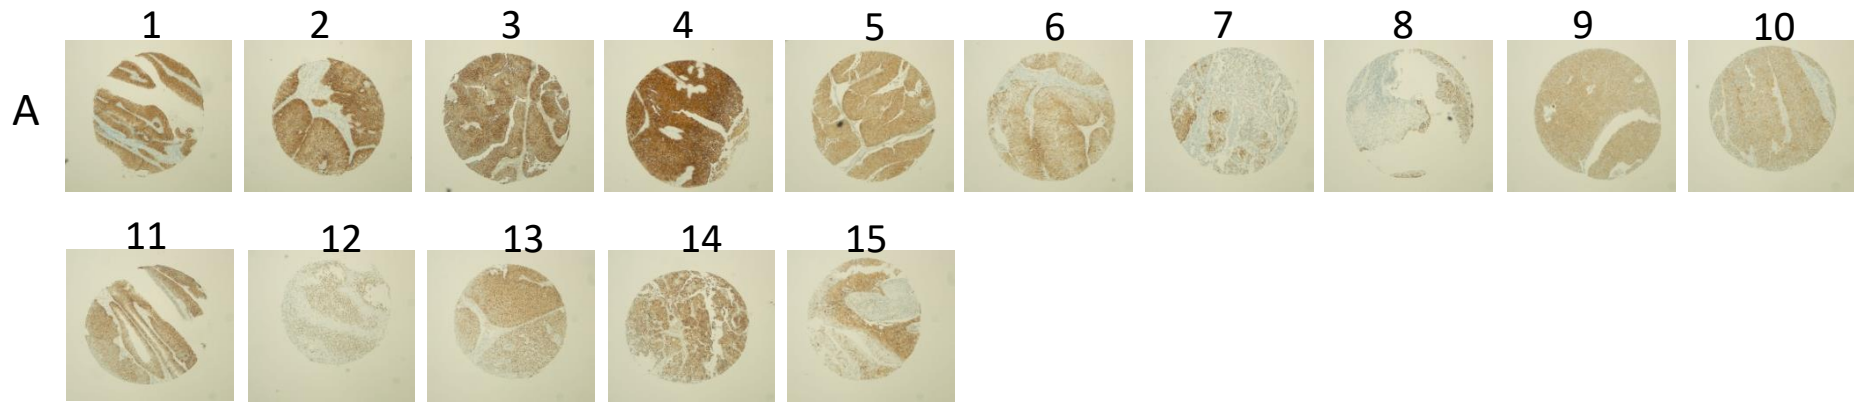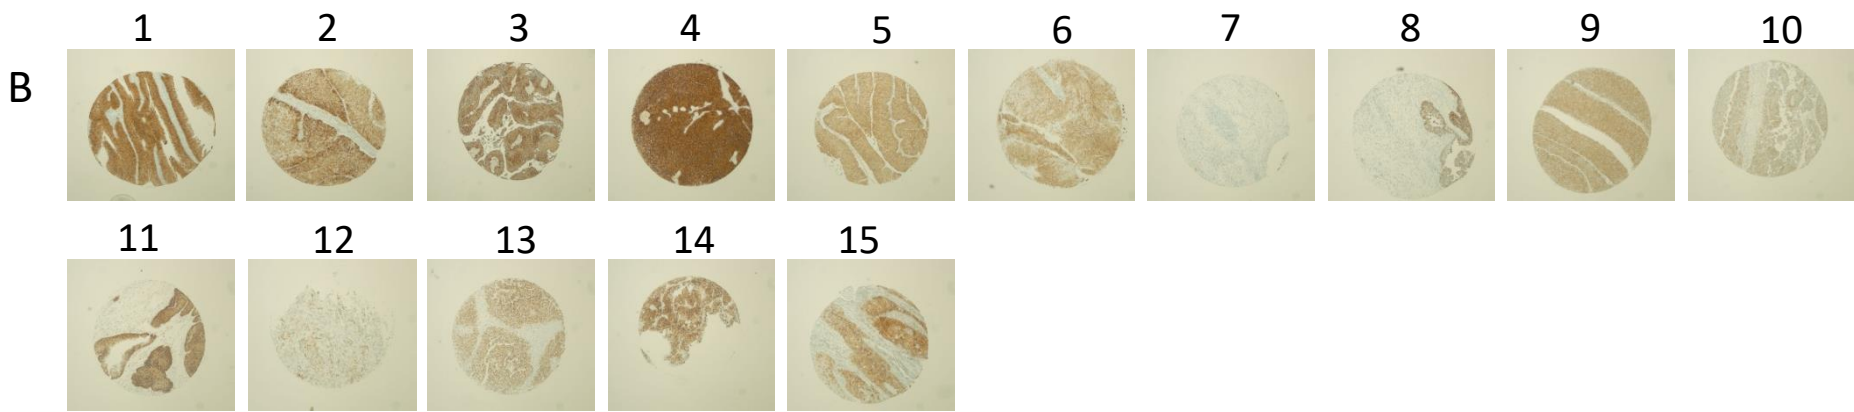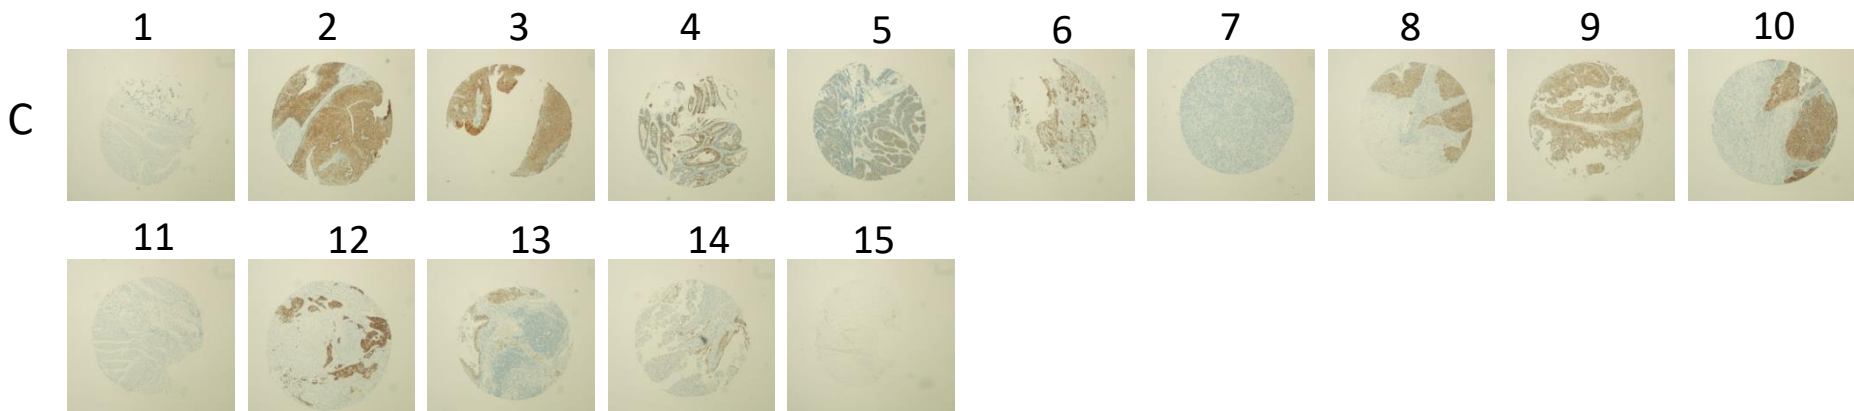

D

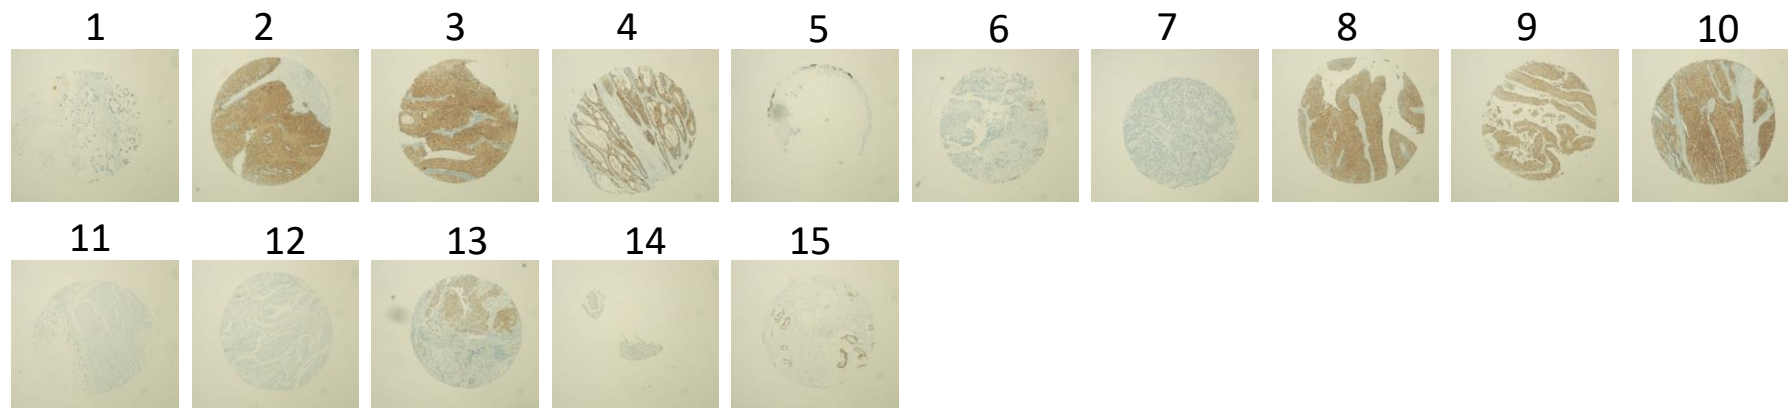

E

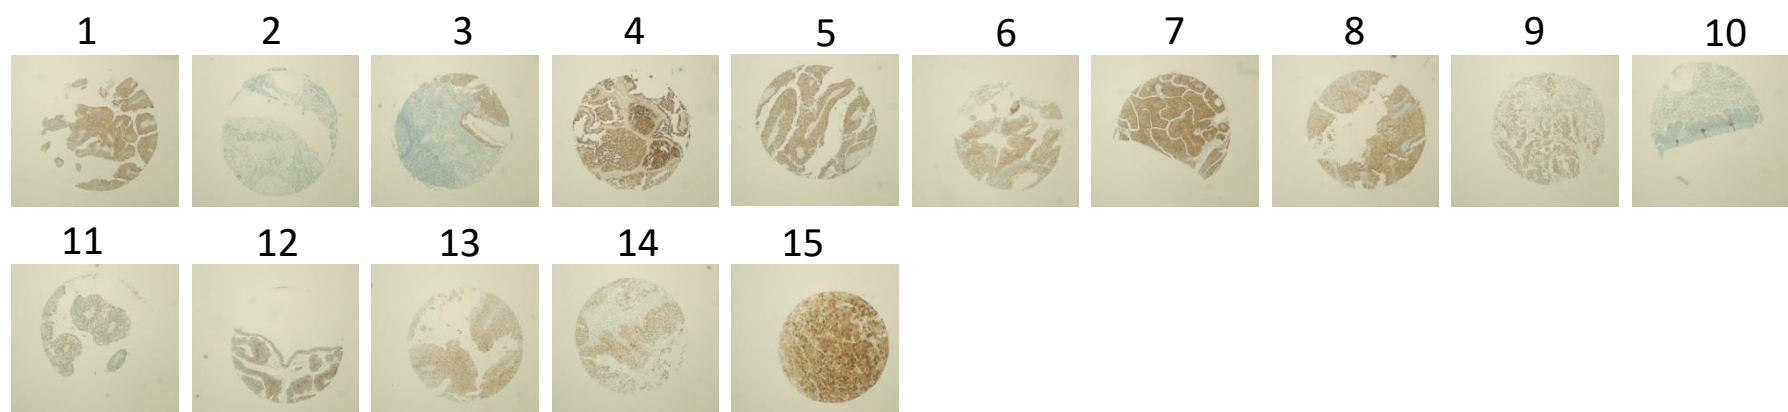

F

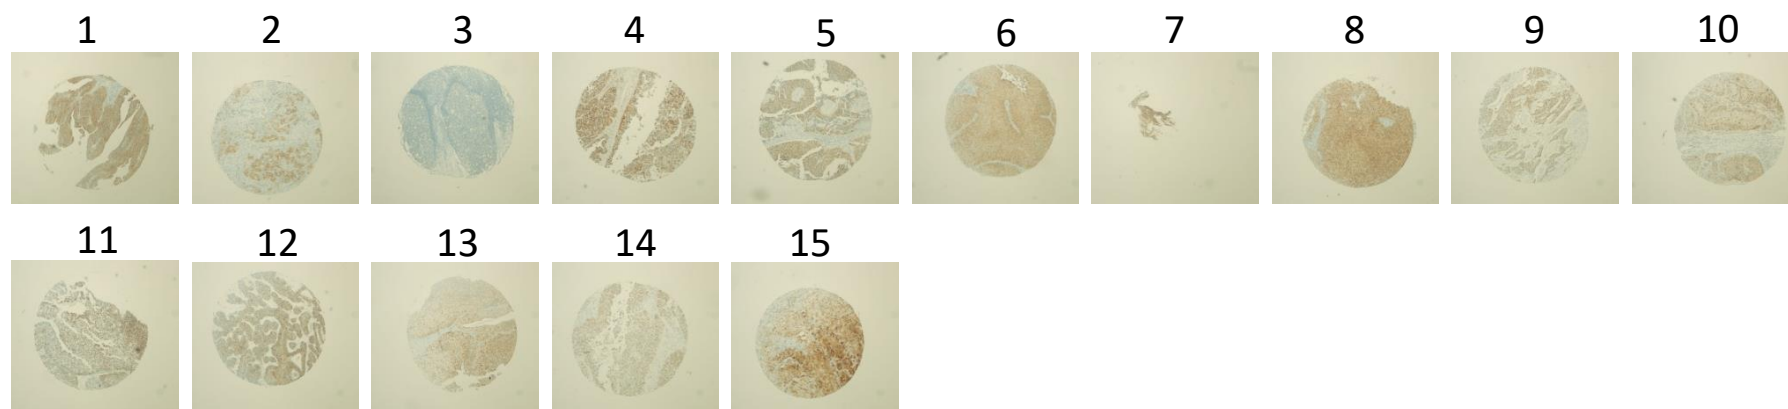

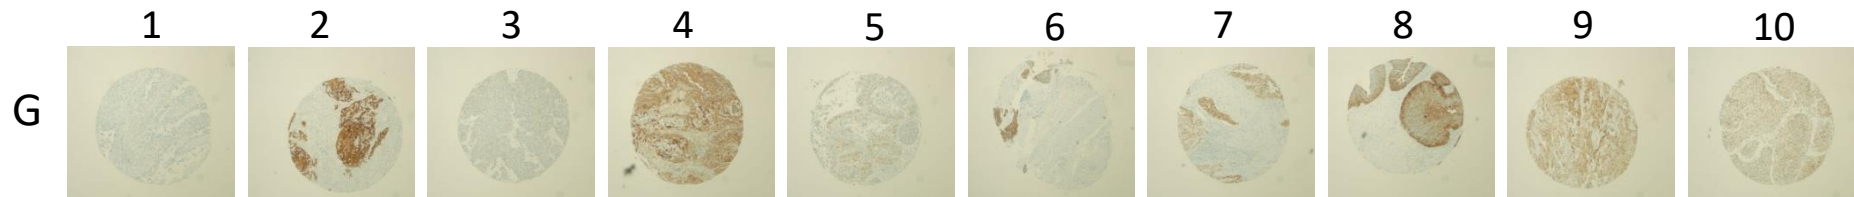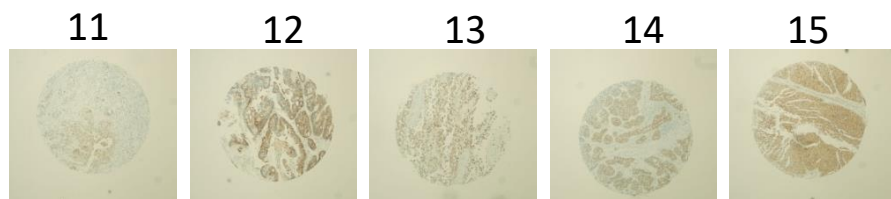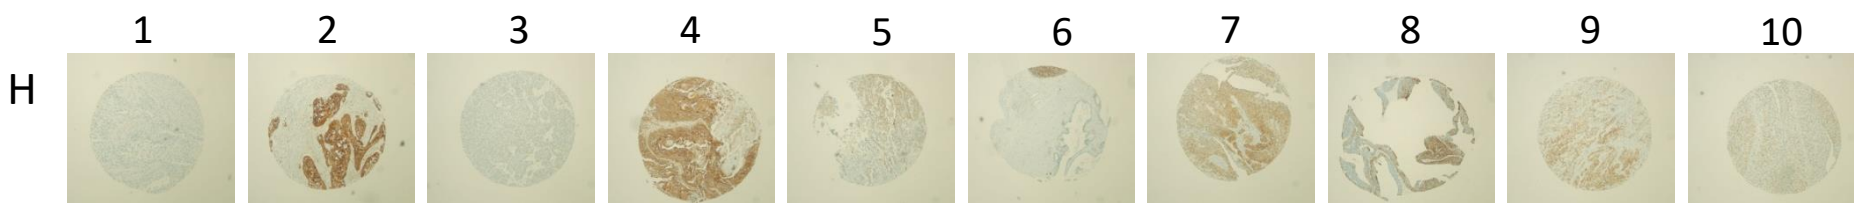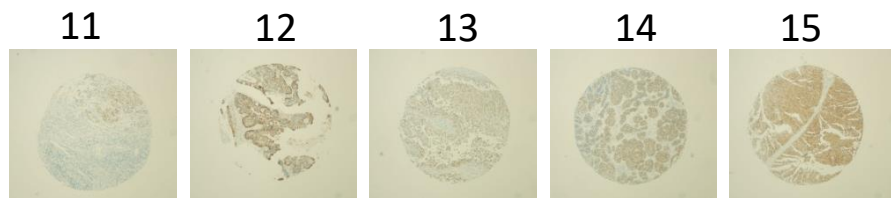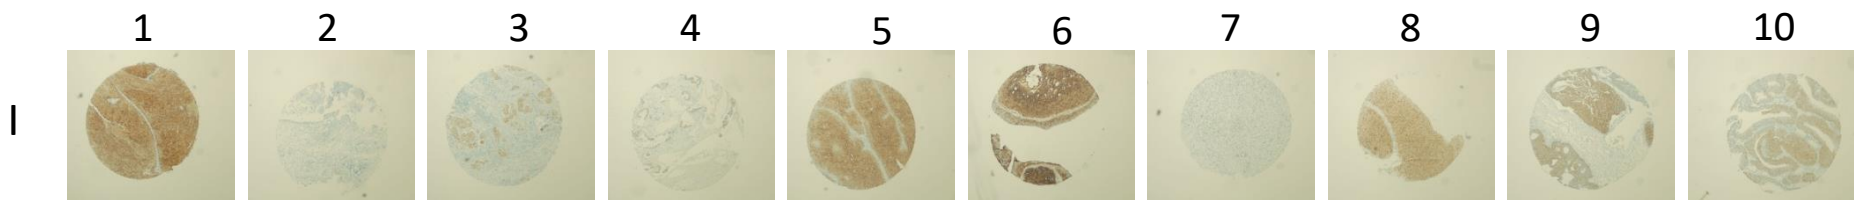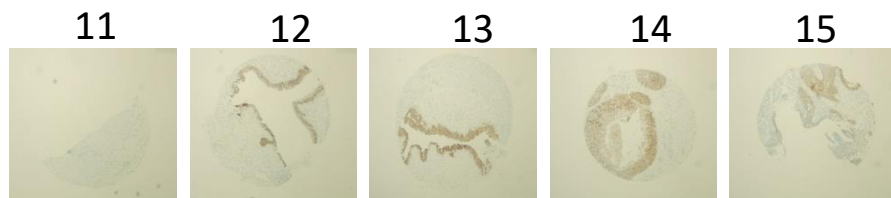

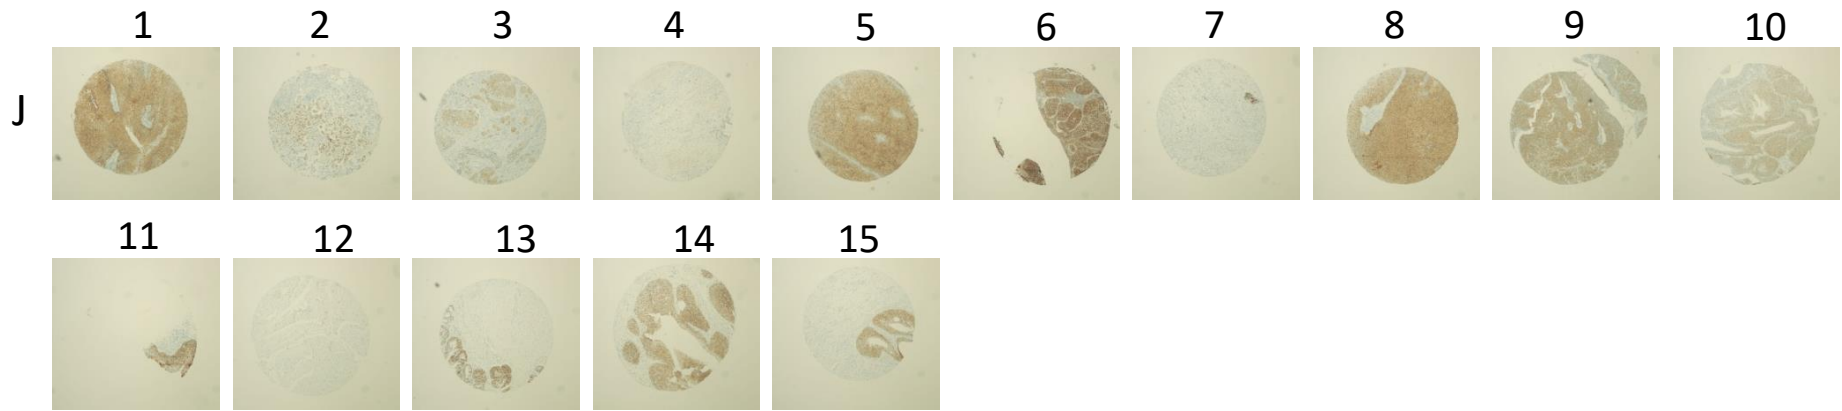

**T-0:A1-5;**

**T-I:A6, A7, A15, B1, B6, B8, C2, C3, C5, C8, C11, C13, D7, E5, E11, E12**

**T-II: A8-11,A14,B2,B5,B7,B11,,B12,C1,C2,C4,C9,C10,C12,D2,D6,D8,D10,D11,D13,E1,  
E2,E6-10, E14**

**T-III:A12,A13,B3,B4,B9,C6,C7,C14,D3,D4,D5,D12,D14,E3,E4;**

**Figure Supplementary 1. IHC staining for maspin in human bladder tissue array with normal and bladder cancer tissues**
