# Supplementary material for: Maspin is a PTEN-Upregulated and p53-Upregulated Tumor Suppressor Gene and Acts as an HDAC1 Inhibitor in Human Bladder Cancer
Source: MDPI journal article supplement (doi:10.3390/cancers12010010), 2019-12-18
Supplement: s1 [file s1]

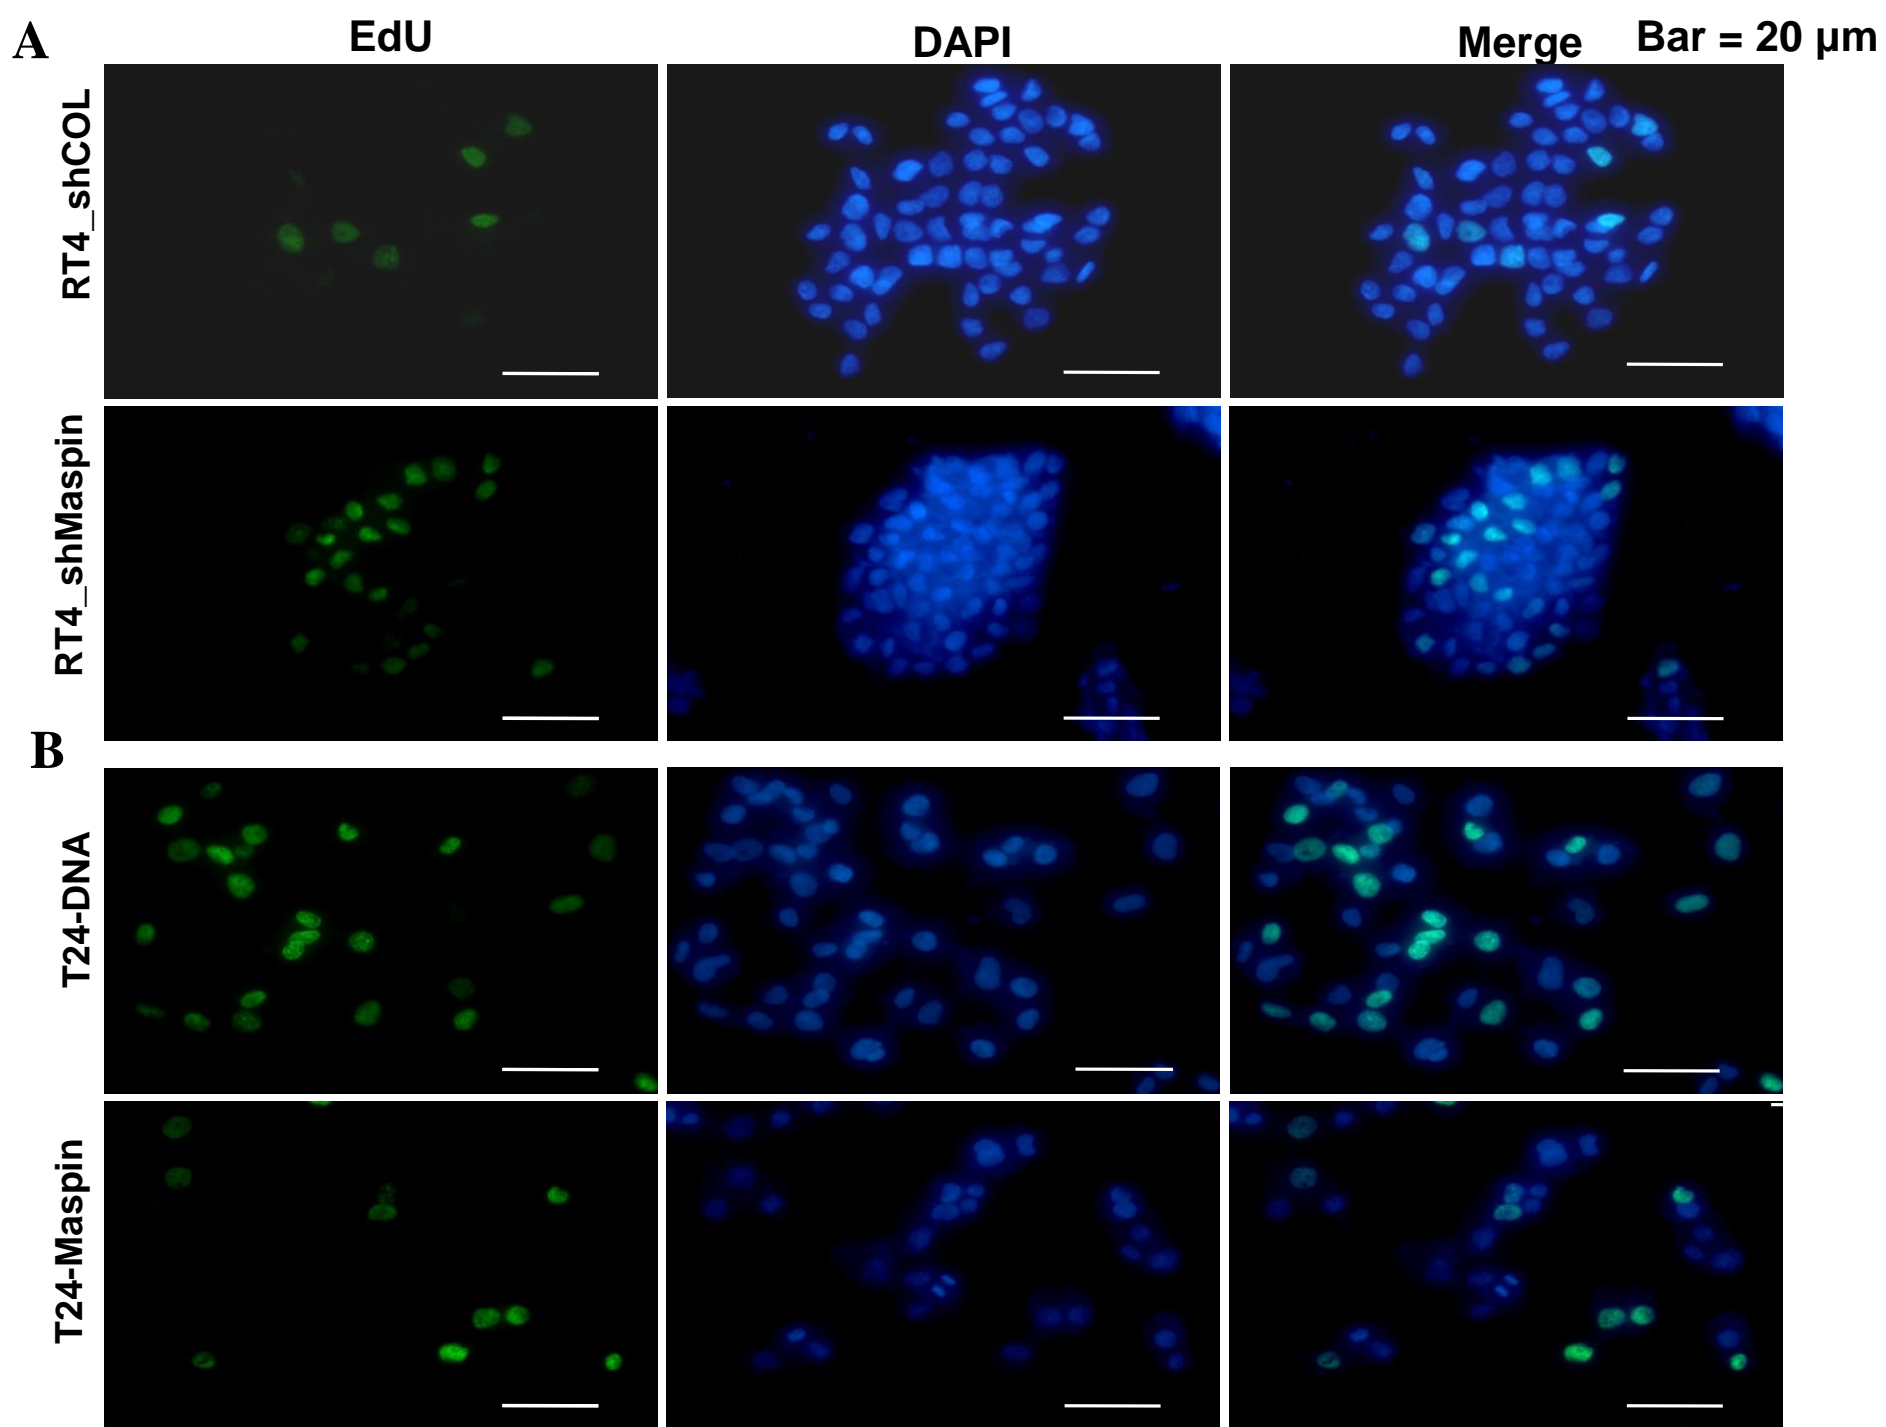

**C**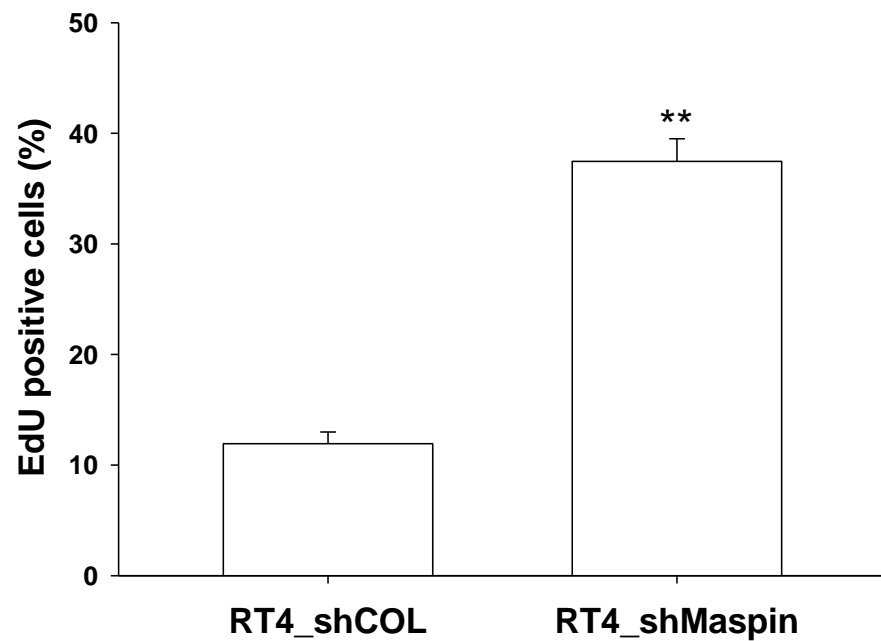**D**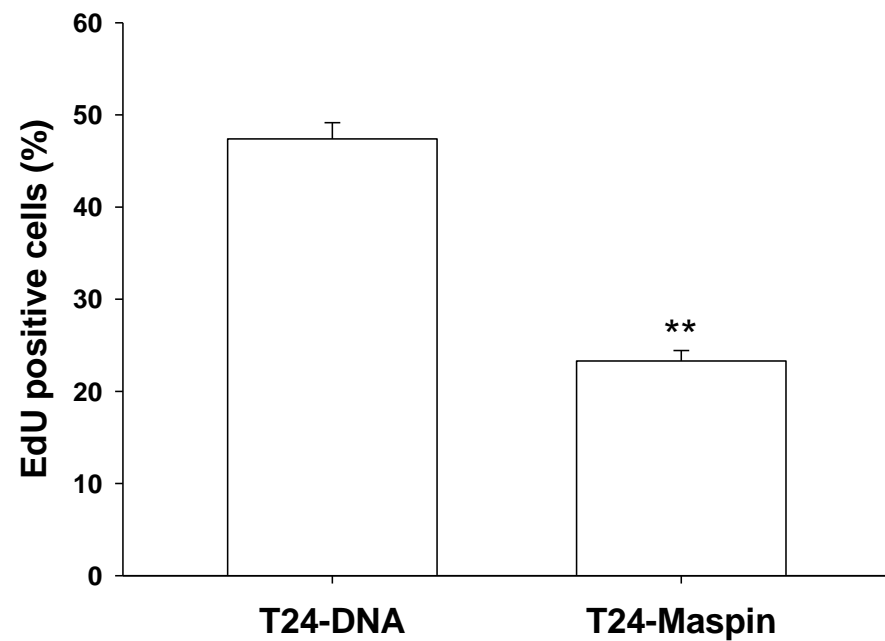

**Figure Supplementary 2. The cell proliferation ability of RT4\_shCOL, RT4\_shMaspin (A, C), T24-DNA, and T24-Maspin cells (B, D) was determined using the EdU staining proliferation assay ( $\pm$  SE, n = 4).**
