# Supplementary material for: Maspin is a PTEN-Upregulated and p53-Upregulated Tumor Suppressor Gene and Acts as an HDAC1 Inhibitor in Human Bladder Cancer
Source: Cancers (Basel). 2019 Dec 18;12(1):10. doi: 10.3390/cancers12010010 (PMC7016534; doi:10.3390/cancers12010010)
Supplement: Supplementary file 1 [file cancers-12-00010-s001.zip]

Archive with 4 entries (4 files):
- Figure supplementary 1.pdf
- Figure supplementary 2.pdf
- Figure supplementary 3.pdf
- Table S1.pdf
